# Supplementary material for: Building blocks for the chemistry of perfluorinated alkoxyaluminates [Al{OC(CF3)3}4]−: simplified preparation and characterization of Li+–Cs+, Ag+, NH4+, N2H5+ and N2H7+ salts
Source: Royal Society of Chemistry journal article supplement (doi:10.1039/d0dt00592d), 2020-01-01
Supplement: d0dt00592d1.pdf [file d0dt00592d1.pdf]

# Building blocks for the chemistry of perfluorinated alkoxyaluminates [Al{OC(CF<sub>3</sub>)<sub>3</sub>}<sub>4</sub>]<sup>-</sup>: simplified preparation and characterization of Li<sup>+</sup>–Cs<sup>+</sup>, Ag<sup>+</sup>, NH<sub>4</sub><sup>+</sup>, N<sub>2</sub>H<sub>5</sub><sup>+</sup> and N<sub>2</sub>H<sub>7</sub><sup>+</sup> salts

## Electronic Supplementary Information

Przemysław J. Malinowski,<sup>a\*</sup> Tomasz Jaroń,<sup>a\*</sup> Małgorzata Domańska,<sup>b</sup> John Slattery,<sup>c</sup> Manuel Schmitt,<sup>d</sup>  
and Ingo Krossing<sup>d</sup>

<sup>a</sup> Centre of New Technologies, University of Warsaw, Banacha 2c, 02-097 Warsaw, Poland.

<sup>b</sup> Faculty of Physics, University of Warsaw, Pasteura 5, 02-093 Warsaw, Poland.

<sup>c</sup> Department of Chemistry, University of York, Heslington, York YO10 5DD, United Kingdom.

<sup>d</sup> Institut für Anorganische und Analytische Chemie and Freiburger Materialforschungszentrum (FMF), Universität Freiburg, Albertstr. 21, 79104 Freiburg, Germany.

\* Correspondence to [malin@cent.uw.edu.pl](mailto:malin@cent.uw.edu.pl) and [t.jaron@cent.uw.edu.pl](mailto:t.jaron@cent.uw.edu.pl)

## Table of contents

|                                                                                                                                                 |    |
|-------------------------------------------------------------------------------------------------------------------------------------------------|----|
| 1. Experimental methods .....                                                                                                                   | 2  |
| 1.1. Synthetic procedures .....                                                                                                                 | 2  |
| 1.1.1. Li[Al(OR <sup>F</sup> ) <sub>4</sub> ] from LiAlH <sub>4</sub> – improved protocol .....                                                 | 2  |
| 1.1.2. Li[Al(OR <sup>F</sup> ) <sub>4</sub> ] from LiAlH <sub>4</sub> – previous optimized protocol .....                                       | 3  |
| 1.1.3. M[Al(OR <sup>F</sup> ) <sub>4</sub> ], M = Na, K, from MAIH <sub>4</sub> .....                                                           | 4  |
| 1.1.4. Ultrasound-induced synthesis of M[Al(OR <sup>F</sup> ) <sub>4</sub> ], M = K – Cs, NH <sub>4</sub> , N <sub>2</sub> H <sub>5</sub> ..... | 4  |
| 1.1.5. Mechanochemical synthesis of M[Al(OR <sup>F</sup> ) <sub>4</sub> ], M = K, Rb, Cs, NH <sub>4</sub> .....                                 | 4  |
| 1.1.6. Synthesis of Ag[Al(OR <sup>F</sup> ) <sub>4</sub> ] .....                                                                                | 5  |
| 1.1.7. M[Al(OR <sup>F</sup> ) <sub>4</sub> ], M = NO .....                                                                                      | 5  |
| 1.1.8. Ag[ <i>alfal</i> ] and Cu[ <i>alfal</i> ] .....                                                                                          | 5  |
| 1.2. Analytical procedures .....                                                                                                                | 6  |
| 1.2.1. FTIR spectroscopy .....                                                                                                                  | 6  |
| 1.2.2. Raman spectroscopy .....                                                                                                                 | 6  |
| 1.2.3. Powder X-ray diffraction .....                                                                                                           | 6  |
| 1.2.4. Single crystal diffraction .....                                                                                                         | 6  |
| 1.2.5. TGA/DSC .....                                                                                                                            | 6  |
| 1.2.6. NMR spectra .....                                                                                                                        | 7  |
| 2. Supplementary analytical results .....                                                                                                       | 8  |
| 3. Crystallographic data .....                                                                                                                  | 23 |
| 4. Supplementary data and figures for description of the crystal structures .....                                                               | 24 |
| 5. DFT calculations details and results .....                                                                                                   | 29 |
| 5.1. Coordinates of optimized structures .....                                                                                                  | 29 |
| Supplementary references .....                                                                                                                  | 30 |

# 1. Experimental methods

## 1.1. Synthetic procedures

Typically, all manipulations have been performed in argon atmosphere in MBraun gloveboxes (typically <1 ppm O<sub>2</sub> and <1 ppm H<sub>2</sub>O) or in Schlenk-type glassware. The previously described H-shaped vessels with P4 frit were used as reactors in all solvent-mediated processes<sup>1</sup> Unless stated otherwise, all the solvents were dried over P<sub>2</sub>O<sub>5</sub> prior to use. We want to stress, that it may happen that the time of pumping of the samples under high vacuum given here may vary depending on the vacuum achieved in the vacuum line, which is difficult to control in the region below 10<sup>-3</sup> mbar, especially when the sensor is exposed to various chemicals present in the line. Therefore we suggest to treat these values only as suggestion.

### 1.1.1. Li[Al(OR<sup>F</sup>)<sub>4</sub>] from LiAlH<sub>4</sub> – improved protocol

A vital improvement of synthesis of Li[Al(OR<sup>F</sup>)<sub>4</sub>] includes a reaction between excess (1.5 times) of LiAlH<sub>4</sub> and (CF<sub>3</sub>)<sub>3</sub>COH performed in **perfluorohexane** directly in the extractor. Such synthesis, which can be conducted in the apparatus presented in Fig. S1, results in pure product obtained in single step, and ensures economical use of expensive (CF<sub>3</sub>)<sub>3</sub>COH.

The following reagents have been successfully used: LiAlH<sub>4</sub> – both Sigma-Aldrich 95% (grey) and Alfa Aesar 97% (almost white) work, but the latter is recommended; (CF<sub>3</sub>)<sub>3</sub>COH – Fluorochem; perfluorohexane – mostly branched, Fluorochem – a mixture of isomers.

The method does not require purification of substrates, since **i**) perfluorocarbons dissolve only traces of water (in order of ppm)<sup>2</sup> **ii**) (CF<sub>3</sub>)<sub>3</sub>COH is dried with excessive LiAlH<sub>4</sub> on the frit **iii**) if any hydrated Li compounds were formed, as ionic compounds, they would not dissolve in C<sub>6</sub>F<sub>14</sub> and would remain on the frit; Li[**An**] is the only product which is soluble in perfluorocarbons ([LiOC(CF<sub>3</sub>)<sub>3</sub>]<sub>4</sub> has not been detected in our tests). Another advantage of the method is that an excess<sup>i</sup> of the (inexpensive) alanate can be used resulting in virtually complete consumption of the alcohol. The oxygen dissolved in C<sub>6</sub>F<sub>14</sub> does not distract the reaction when this solvent is used in small amount, which can be achieved when the alcohol is added dropwise (!). Generally, it is recommended to introduce only as much of perfluorocarbon as needed to soak the LiAlH<sub>4</sub> left on the frit and keep some of it circulating in the system. In our tests, we were able to obtain as much as 80 g of Li[Al(OR<sup>F</sup>)<sub>4</sub>] using only 10 ml of C<sub>6</sub>F<sub>14</sub>, although this requires very slow addition of the alcohol. Large portion of (CF<sub>3</sub>)<sub>3</sub>COH may result in very vigorous reaction and rapid formation of considerable amount of Li[Al(OR<sup>F</sup>)<sub>4</sub>] on the frit which may hamper the circulation of perfluorohexane. We have also observed, that some samples of LiAlH<sub>4</sub> (grey from Sigma-Aldrich) started to react with the alcohol only after induction period of several minutes, probably due to surface inactivation. In such case, if a large portion of the alcohol is added, the reaction may become very vigorous upon initiation and the whole reaction mixture may get hot posing danger (note instability of LiAlH<sub>4</sub> above 120°C).

---

<sup>i</sup> Our experience shows that some vendors supply LiAlH<sub>4</sub> which is very contaminated. One of the batches (we do not name the vendor) yielded only <1 g of pure LiAlH<sub>4</sub> in extraction from the 25 g of crude chemical with the reported assay of 95% (!). Therefore the method relies on the quality of the starting alanate. Our recommendation is to use >97% purity and at least 1.5 molar excess of LiAlH<sub>4</sub> to minimize loses of the alcohol.

The temperature of the hot bath should be *ca.* 70–80 °C to boil C<sub>6</sub>F<sub>14</sub> off. To obtain higher yields, it is vital to use an efficient condenser keeping the alcohol in the system, similarly to the previously reported protocols.<sup>S1</sup> The **typical yield** with a highly efficient condenser kept at 0 °C (temperature of the condenser and not the oil in the circulation cryostat) is >97%, as based on the amount of the alcohol used and the weight of recovered product.

Upon complete removal of perfluorohexane (under dynamic vacuum, 30 minutes at 10<sup>-2</sup> mbar for a flask kept in still warm bath used during the synthesis) the product is obtained in the form of large grains, and ready to use without further purification, according to FTIR, NMR and XRPD results.

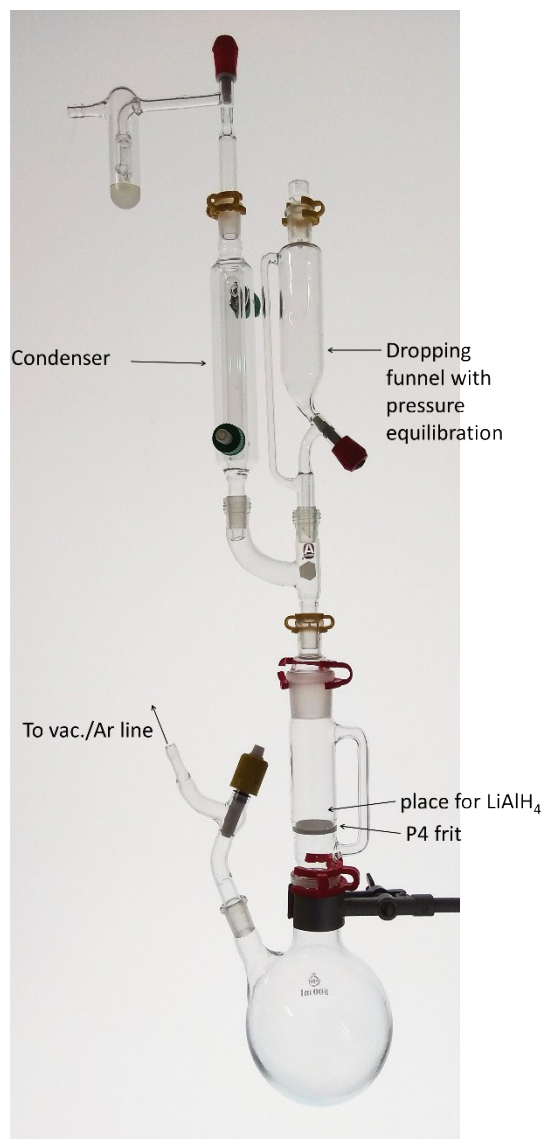

Figure S1. The experimental setup for one-pot synthesis of Li[An].

### 1.1.2. Li[Al(OR<sup>F</sup>)<sub>4</sub>] from LiAlH<sub>4</sub> – previous optimized protocol <sup>S3</sup>

The synthesis uses purified and very finely ground LiAlH<sub>4</sub> (=> Dissolution of crude LiAlH<sub>4</sub> in Et<sub>2</sub>O, filtration and removal of the solvent of the filtrate to constant weight at 100 °C. Care has to be taken, as LiAlH<sub>4</sub> decomposes above 120 °C. Thus, a water bath is to be recommended for heating, as this prevents temperatures to get higher than 100 °C.). This purified and very finely ground LiAlH<sub>4</sub> is placed in a two-necked Schlenk flask and suspended in petroleum ether (boiling fraction 80 to 100 °C; *ca.* 50

mL per 1 g of LiAlH<sub>4</sub>). The reaction is routinely done in 100 g product scale with isolated yields around 99 %. One neck is used to connect a pressure-equalizing dropping funnel, while the second is to attach an intensive gas cooler set to -25°C by an external thermostat ) with a bubbler at its top. It is extremely important to use the gas cooler instead of a conventional reflux condenser and to cool the gas cooler to low temperature as the evolving H<sub>2</sub> evaporates the very volatile (CF<sub>3</sub>)<sub>3</sub>COH and one loses yield, if not sticking to this protocol. In addition, the product then contains unreacted LiAlH<sub>4</sub>, which is detrimental to follow-up chemistry. Thus, 4.1 equivalents of (CF<sub>3</sub>)<sub>3</sub>COH are added dropwise to the stirred suspension. After all alcohol is consumed, the mixture is heated under reflux for about 3 h. After that time, the Schlenk vessel is cooled down to -25°C to allow complete precipitation of the product. The solvent is decanted off and its remnants are removed under dynamic vacuum (10<sup>-3</sup> mbar) until constant weight of the sample. This material is completely colorless and may be used directly without further purification. A simple test, if unreacted LiAlH<sub>4</sub> is present, is to add a small quantity of the Li[Al(OR<sup>F</sup>)<sub>4</sub>] to water. If there is no humming sound at all and if it is a clear solution it is clean. If some humming (reaction of LiAlH<sub>4</sub> with water) is present or the solution is turbid, one should grind the Li[Al(OR<sup>F</sup>)<sub>4</sub>] inside a glovebox, suspend it again with petroleum ether and reflux it with addition of extra alcohol similar to the procedure described above. However, with the process described above this is typically not necessary.

#### 1.1.3. M[Al(OR<sup>F</sup>)<sub>4</sub>], M = Na, K, from MAIH<sub>4</sub>

The suspension of MAIH<sub>4</sub> (NaAlH<sub>4</sub> – Sigma-Aldrich, purified by extraction by THF, filtration and evaporation of the solvent, KAlH<sub>4</sub> – prepared from KH and LiAlH<sub>4</sub> in diglyme/THF<sup>S4,S5</sup>) in hexane was cooled to 0 °C and (CF<sub>3</sub>)<sub>3</sub>COH (Fluorochem) was slowly added with an excess (*ca.* 150%). The reaction mixture was refluxed for several hours. The solvent has been evaporated and the white solid product has been extracted in Soxhlet extractor using dichloromethane (Sigma-Aldrich, dried over P<sub>2</sub>O<sub>5</sub>) for M=Na and K, which yield pure products as evaluated by FTIR, NMR and XRPD analyses. Typical yield: >80%.

#### 1.1.4. Ultrasound-induced synthesis of M[Al(OR<sup>F</sup>)<sub>4</sub>], M = K – Cs, NH<sub>4</sub>, N<sub>2</sub>H<sub>5</sub>

Li[Al(OR<sup>F</sup>)<sub>4</sub>] and an excess (200%) of ground anhydrous MCl were placed in a reactor together with anhydrous CH<sub>2</sub>Cl<sub>2</sub> (*ca.* 5 ml per 1 g of the expected product) and sonicated overnight using a Bandelin DL 156 BH ultrasonic bath with 60% of the maximum output power to reduce heating and loss of water in the bath during the long process. The products were extracted with dichloromethane. Typical yield of the recovered products: M = K *ca.* 40%, Rb *ca.* 65%, Cs *ca.* 85%. Tests with KBr and KF have shown that these halides give much lower yields (30% and 25% respectively). However, with CsF it was already above 80%.

This method is not recommended for the synthesis of Na[An] due to very slow reaction and low conversion rate.

#### 1.1.5. Mechanochemical synthesis of M[Al(OR<sup>F</sup>)<sub>4</sub>], M = K, Rb, Cs, NH<sub>4</sub>

Li[Al(OR<sup>F</sup>)<sub>4</sub>] and an excess of MCl (*ca.* 200%) were mixed and milled for 30 min in 5 min cycles at 1400 rpm using a stainless steel vessel containing a stainless steel milling disc and a LMW-S laboratory vibrating mill (Testchem), Figure S2. Between the milling cycles the vessel was cooled with liquid

nitrogen to maintain room temperature. The product was then extracted using anhydrous dichloromethane. Typical yield: >80%.

A similar procedure has been applied initially for synthesis of  $\text{NH}_4[\text{Al}(\text{OR}^{\text{F}})_4]$ , however, it resulted in the product contaminated by  $[\text{N}_2\text{H}_7][\text{Al}(\text{OR}^{\text{F}})_4]$ , probably due to a significant excess of  $\text{NH}_4\text{Cl}$ .

While this is a very convenient and fast method, the samples prepared this way may be slightly contaminated with small amount of metal halides which may be transferred through the glass frit due to very small grain size.

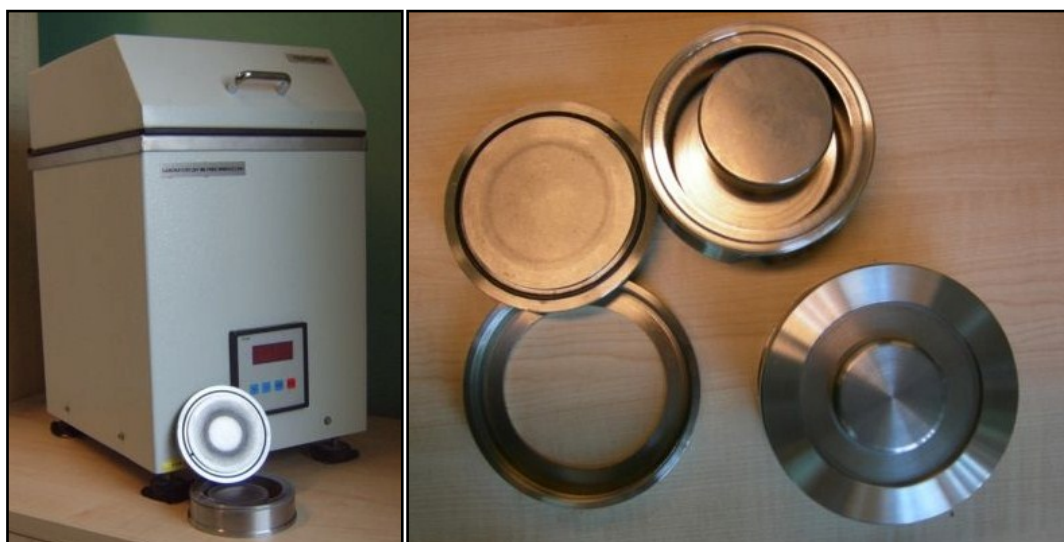

Figure S2. The LMW-S vibrational mill (left) and a stainless steel disc bowls (right) used for mechanochemical synthesis.

#### 1.1.6. Synthesis of $\text{Ag}[\text{Al}(\text{OR}^{\text{F}})_4]$

The synthesis starts from purified  $\text{Li}[\text{Al}(\text{OR}^{\text{F}})_4]$  and *ca.* 40% molar excess of  $\text{AgF}$  (Fluorochem – we have found the compound of very good quality and used it with success despite previous suggestions to use another vendor of the chemical). The excess of  $\text{AgF}$  can be also at the level of 15-20%, but since  $\text{AgF}$  can be in the state of fine powder mixed with larger chunks, to provide its higher surface area we recommend the higher value. For each gram of  $\text{Li}[\text{Al}(\text{OR}^{\text{F}})_4]$  we recommend at least 2 ml of  $\text{SO}_2$ , what facilitates extraction of  $\text{Ag}[\text{Al}(\text{OR}^{\text{F}})_4]$ . The reaction mixture is left on vigorous stirring. Complete conversion is achieved after 7-10 days. The typical yield of isolated product is *ca.* 85%, i.e. similar for the route with perfluorohexane used as reaction medium.<sup>56</sup>

#### 1.1.7. $\text{M}[\text{Al}(\text{OR}^{\text{F}})_4]$ , $\text{M} = \text{NO}$

The compound was synthesized according to the previously reported method.<sup>57</sup>

#### 1.1.8. $\text{Ag}[\text{alfal}]$ and $\text{Cu}[\text{alfal}]$

The silver salt was obtained according to literature protocol<sup>58</sup> and was crystallized from  $\text{C}_6\text{F}_6$  (though the compound is also soluble in  $\text{C}_6\text{F}_{14}$ ).

Route to crystals of  $\text{Cu}[\text{alfal}]$  is described in the main manuscript. Note, that heating to *ca.* 45°C of dry  $\text{Cu}[\text{Al}(\text{OR}^{\text{F}})_4]$  leads to amorphous solid. Slight contamination with  $\text{Ag}$  visible in the crystal structure is the result of presence of silver salt (most probably  $\text{AgI}$ , but presence of minor amounts of  $\text{Ag}[\text{Al}(\text{OR}^{\text{F}})_4]$  cannot be overruled) during heating of  $\text{Cu}[\text{Al}(\text{OR}^{\text{F}})_4]$ .

## 1.2. Analytical procedures

### 1.2.1. FTIR spectroscopy

The FTIR spectra of the solid samples were measured either in transmission or in reflection geometry. For the measurements in transmission mode a Vertex 80v FTIR spectrometer (Bruker) has been used. The samples were placed between the windows made of AgCl. The measurements in reflection geometry were conducted using Nicolet Magna-IR spectrometer with a Diamond-ATR module with ATR corrections applied.

### 1.2.2. Raman spectroscopy

Raman spectra have been recorded on a Bruker VERTEX 70 spectrometer with RAM II module at 1064 nm (Nd-YAG laser). Samples were closed in a flame-sealed glass capillaries.

### 1.2.3. Powder X-ray diffraction

Powder X-ray diffraction (XRDP) patterns of the samples sealed inside quartz capillaries (diameter of 0.5–1 mm) were measured on three diffractometers: Bruker D8 Discover diffractometer (parallel beam; the  $\text{CuK}_{\alpha 1}$  and  $\text{CuK}_{\alpha 2}$  radiation), Panalytical X'Pert Pro diffractometer (parallel beam; the  $\text{CoK}_{\alpha 1}$  and  $\text{CoK}_{\alpha 2}$  radiation) and Stoe Stadi P powder diffractometer using monochromated  $\text{Mo K}_{\alpha 1}$  radiation and PSD or Mythen 1K microstrip X-ray detector. They are marked according to the radiation used.

### 1.2.4. Single crystal diffraction

The single crystals suitable for structure determination of  $\text{M}[\text{Al}(\text{OR}^{\text{F}})_4]$  were grown in various ways. Good quality crystals of the salts containing larger cations,  $\text{M} = \text{K}, \text{Rb}, \text{NH}_4, \text{N}_2\text{H}_5$ , were easily obtained from the saturated solutions in dichloromethane. For  $\text{M}=\text{Na}$  a prolonged (days) crystallization from slowly cooled (from  $25^\circ\text{C}$  down to  $-40^\circ\text{C}$  in *ca.* 24 h) FC-770 solution was required to obtain crystals of sufficient quality. During the measurements the crystals were immersed in the protective perfluorinated oil (Krytox 1531).

Data collection and reduction was performed with one of the two setups: Agilent Supernova X-ray diffractometer with  $\text{K}\alpha$ -Cu radiation (microsource) with data reduction performed by CrysAlisPro software (v. 38.43)<sup>59</sup> or Bruker Smart Apex II Quazar single crystal diffractometer, graphite-monochromated  $\text{Mo-K}\alpha$  radiation from microsource, data collection and reduction: APEX v2013.10-0 and SAINT V8.34A; absorption correction: TWINABS 2012/1. Structure solution: SHELXT<sup>510</sup>, refinement against  $F^2$  in Shelxl-2013,<sup>510</sup> with ShelXle as GUI software.<sup>511</sup> The disorder of the  $-\text{OC}(\text{CF}_3)_3$  groups was resolved using DSR.<sup>512</sup> Graphical presentation of crystal structures has been performed with Vesta.<sup>513</sup>

### 1.2.5. TGA/DSC

Thermal decomposition was investigated using a combined thermogravimeter (TGA) and differential scanning calorimeter (DSC) from Netzsch – STA 409 PG. The samples were placed inside  $\text{Al}_2\text{O}_3$  crucibles, and were heated at  $5^\circ\text{C min}^{-1}$  rate under a constant Ar (99.9999%) flow. The evolved gases were analyzed with a quadrupole mass spectrometer (MS) QMS 403 C (Pfeiffer Vacuum), connected to the TGA/DSC device by a quartz capillary preheated to  $200^\circ\text{C}$  to avoid condensation of low-boiling volatiles. Range of  $\text{M}/\text{Z}$  from 1 to at least 120 was studied.

### 1.2.6. NMR spectra

NMR spectra were recorded on Bruker AVANCE III HD 300 MHz or 500 MHz. Samples highly susceptible to traces of water (Li, Na, N-compounds,  $\text{Cl}_3\text{CCN}$  solvates) were placed in 4mm air-tight NMR tubes equipped with PTFE valve and dissolved in  $\text{SO}_2$ . Deuterated solvents (acetone,  $\text{CDCl}_3$  or  $\text{CD}_2\text{Cl}_2$ ) for these compounds were placed in outer, 5mm tube. K-Cs salts were dissolved in  $\text{CD}_2\text{Cl}_2$  (not dried) in air.

It was observed, that in every  $^{19}\text{F}$  measurement there is a weak signal ca. 0.8 ppm less negative the main one. This is the signal from the free  $\text{HOC}(\text{CF}_3)_3$ , which is commonly found in the spectra of  $[\text{Al}(\text{ORF})_4]^-$  salts. For  $^1\text{H}$  spectra, the signals from  $\text{NH}_4$  and  $\text{N}_2\text{H}_5$  are not very strong as compared to impurities present in deuterated  $(\text{CD}_3)_2\text{CO}$  ( $\text{H}_2\text{O}$  and not perdeuterated acetone).

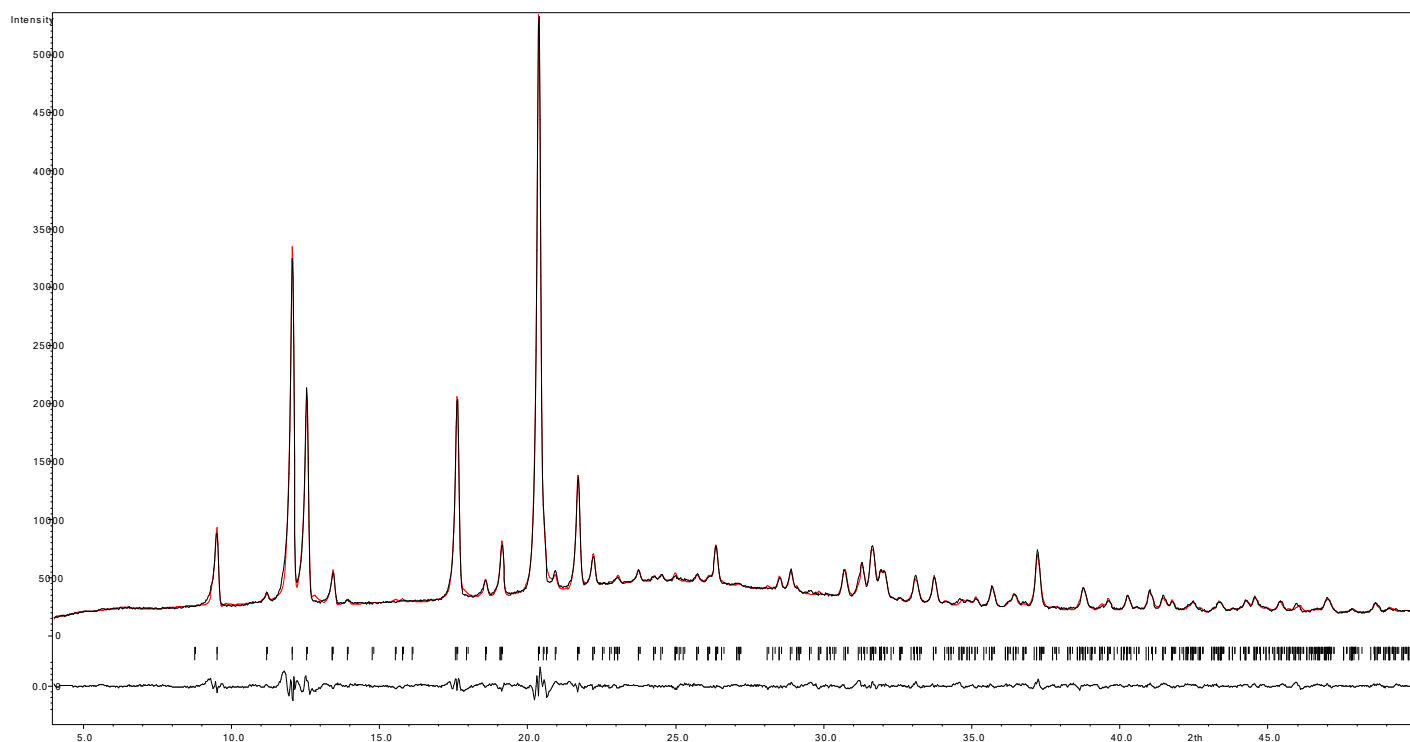

## 2. Supplementary analytical results

Figure S3. The Rietveld fit for the sample of  $\text{Li}[\text{Al}(\text{OR}^{\text{F}})_4]$  prepared according to the procedure described in the section 1.1.1. The measured powder pattern (black line), the calculated powder pattern (red line), the Bragg reflections and the difference plot (bottom) have been shown.  $wR_p = 3.95\%$ ,  $T = \text{ca. } 295 \text{ K}$ ,  $a = 10.104(4) \text{ \AA}$ ,  $b = 13.886(6) \text{ \AA}$ ,  $c = 21.504(8) \text{ \AA}$ ,  $V = 3017(2) \text{ \AA}^3$  (ca. 6.8% expansion as compared to 100 K).  $\text{Co K}\alpha$ .

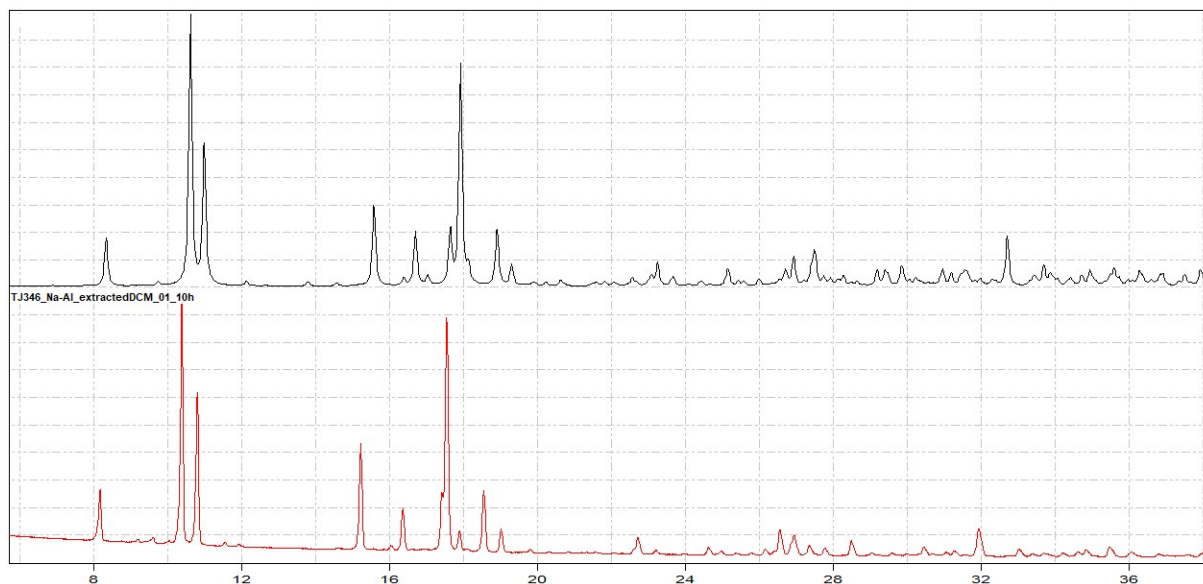

Figure S4. XRD patterns of  $\text{Na}[\text{Al}(\text{OR}^{\text{F}})_4]$ : experimental (RT, bottom – red curve; **prepared as described in 1.1.3**) and generated from the crystal structure (data for 100 K, top – black curve). The shift in positions of reflexes and differences in intensities are the result of different measurement temperatures.  $\text{Cu K}\alpha$ .



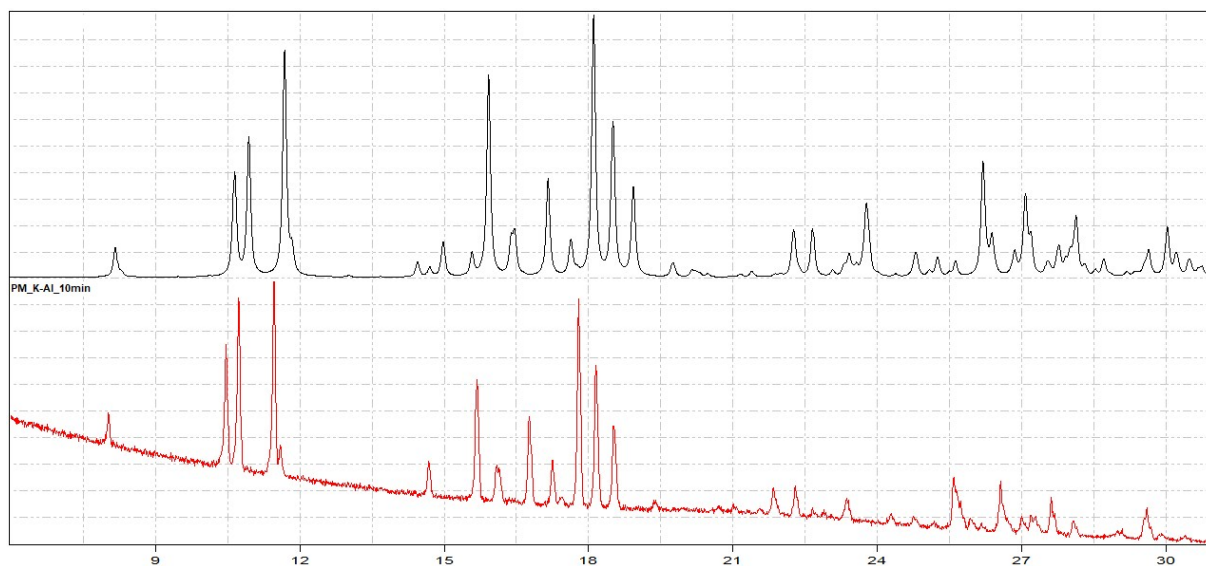

Figure S5. XRD patterns of  $\text{K}[\text{Al}(\text{OR}^{\text{F}})_4]$ : experimental (RT, bottom – red curve; **prepared as described in 1.1.4**) and generated from the crystal structure (data for 100 K, top – black curve). The shift in positions of reflexes and differences in intensities are the result of different measurement temperatures.  $\text{Cu K}\alpha$ .

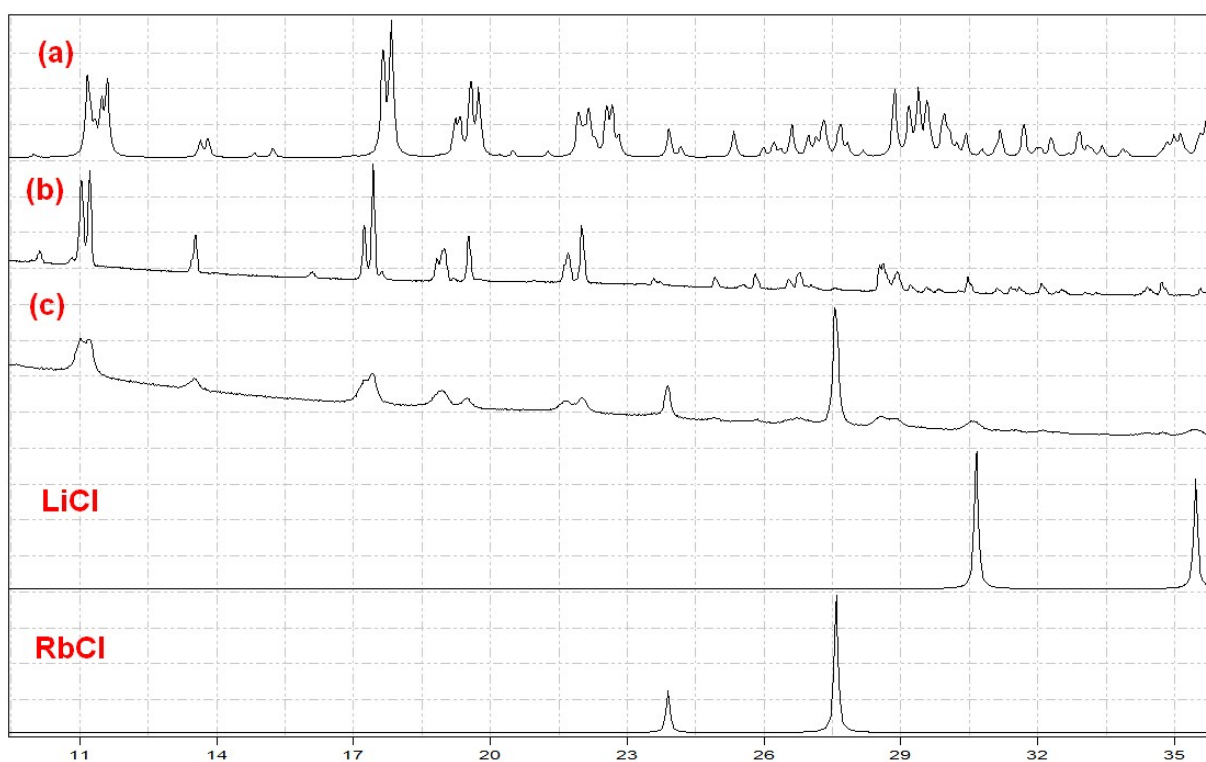

Figure S6. XRD patterns of  $\text{Rb}[\text{Al}(\text{OR}^{\text{F}})_4]$ : (a) generated from the crystal structure (data for 100 K); (b) experimental (RT, **prepared as described in 1.1.5 – extracted with dichloromethane and precipitated with hexane<sup>ii</sup>**); (c) experimental (RT, **prepared as described in 1.1.5 – before extraction**). The patterns generated for  $\text{LiCl}$  and  $\text{RbCl}$  were included for comparison. The shift in positions of reflexes and differences in intensities are the result of different measurement temperatures.  $\text{Cu K}\alpha$ .

<sup>ii</sup> Precipitation with hexane instead of evaporation has been applied as  $\text{Li}[\text{Al}(\text{OR}^{\text{F}})_4]$  of low purity was used in this particular synthesis.

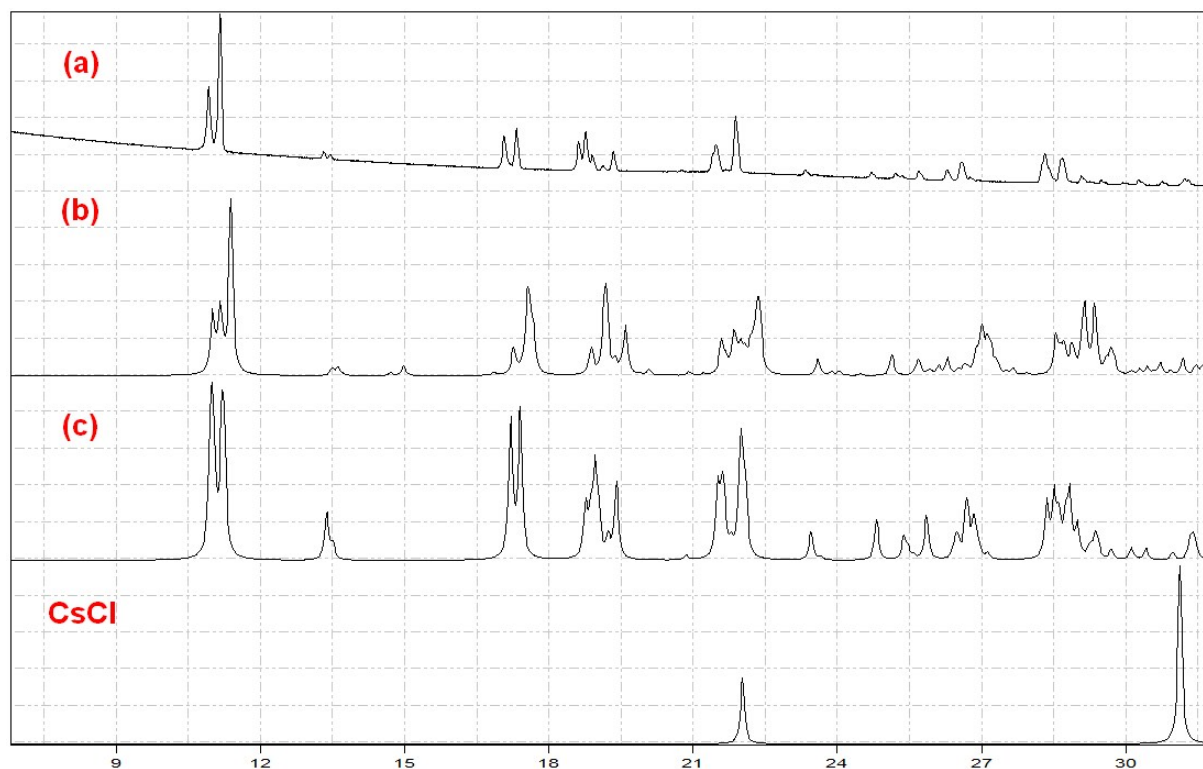

Figure S7. XRD patterns of  $\text{Cs}[\text{Al}(\text{OR}^{\text{F}})_4]$ : (a) experimental (RT), **prepared as described in 1.1.5 – extracted with dichloromethane and precipitated with hexane<sup>iii</sup>**; (b) generated from the *P1* crystal structure (data for 100 K); generated from the *Cc* crystal structure (data for 223 K).<sup>S14</sup> The pattern generated for CsCl was also included for comparison. The shift in positions of reflexes and differences in intensities are the result of different measurement temperatures. Cu  $K\alpha$ .

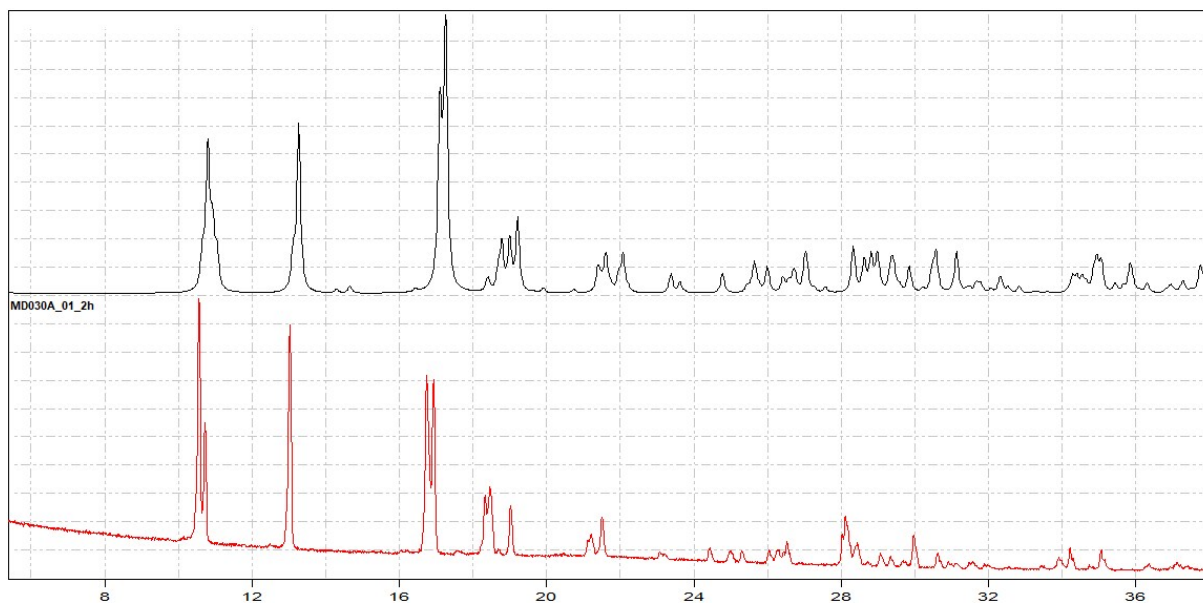

Figure S8. XRD patterns of  $\text{NH}_4[\text{Al}(\text{OR}^{\text{F}})_4]$ : top – generated from the crystal structure (data for 100 K); bottom – experimental (RT), the sample **prepared as described in 1.1.4, extracted with dichloromethane**. The shift in positions of reflexes and differences in intensities are the result of different measurement temperatures – possibly a polymorphic transition occurs. Cu  $K\alpha$ .

<sup>iii</sup> Precipitation with hexane instead of evaporation has been applied as  $\text{Li}[\text{Al}(\text{OR}^{\text{F}})_4]$  of low purity was used in this particular synthesis.

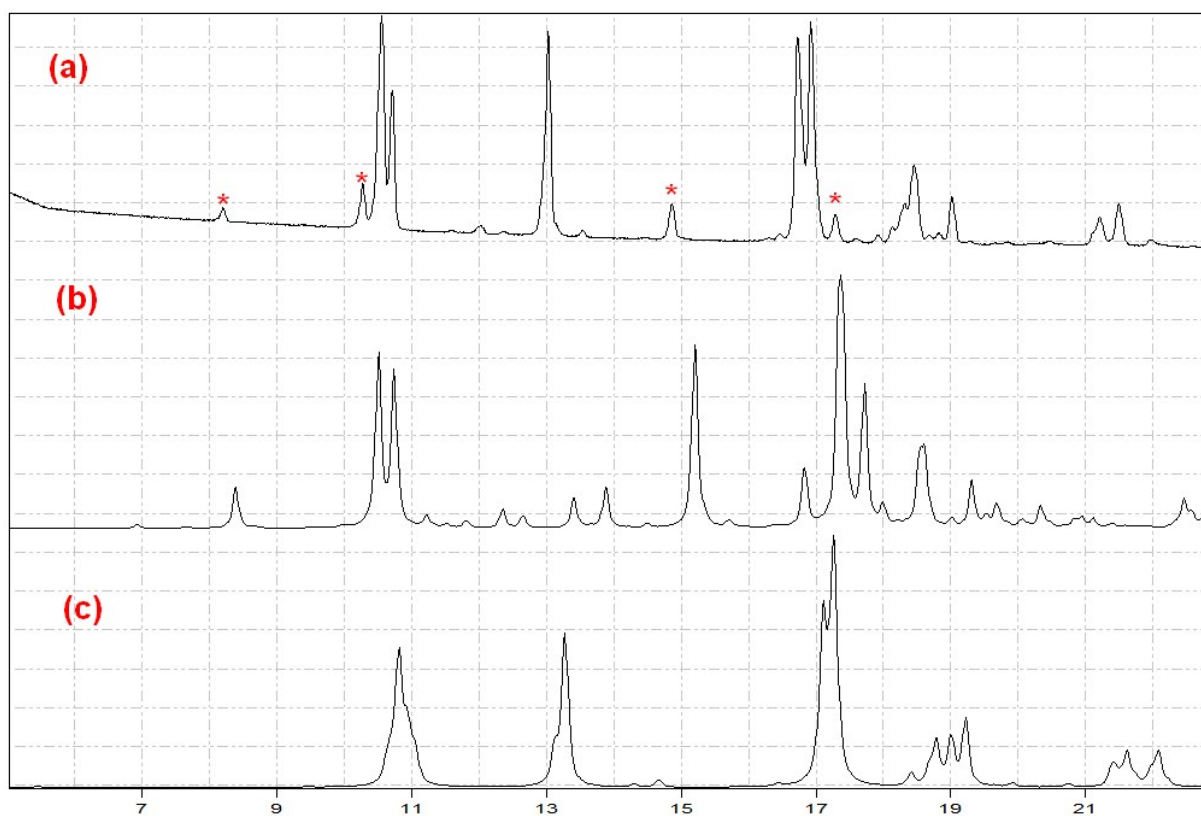

Figure S9. XRD patterns of: (a) the sample of  $\text{NH}_4[\text{Al}(\text{OR}^{\text{F}})_4]$  prepared as described in 1.1.5 – extracted with dichloromethane, the characteristic peaks from  $\text{N}_2\text{H}_7[\text{Al}(\text{OR}^{\text{F}})_4]$  have been marked with an asterisk; (b) generated from the crystal structure of  $\text{N}_2\text{H}_7[\text{Al}(\text{OR}^{\text{F}})_4]$  (data for 100 K); (c) generated from the crystal structure of  $\text{NH}_4[\text{Al}(\text{OR}^{\text{F}})_4]$  (data for 100 K). The shift in positions of reflexes and differences in intensities are the result of different measurement temperatures – possibly a polymorphic transition occurs for  $\text{NH}_4[\text{Al}(\text{OR}^{\text{F}})_4]$ . Cu  $\text{K}\alpha$ .

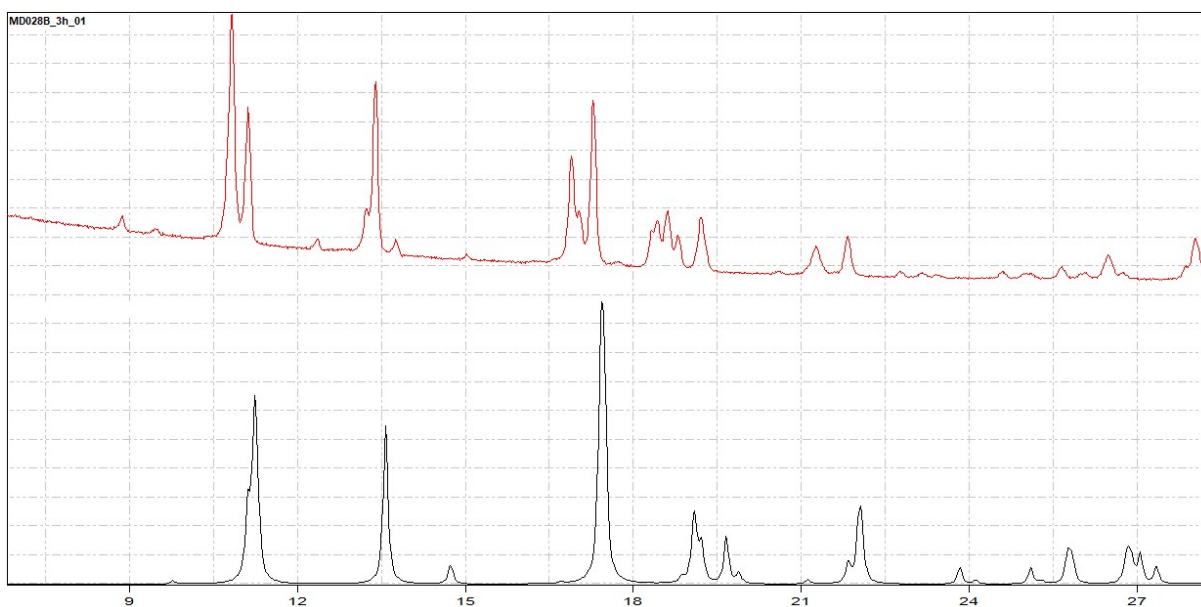

Figure S10. XRD patterns of: the sample of  $\text{N}_2\text{H}_5[\text{Al}(\text{OR}^{\text{F}})_4]$  prepared as described in 1.1.4 – extracted with dichloromethane (top); generated from the crystal structure of  $\text{N}_2\text{H}_5[\text{Al}(\text{OR}^{\text{F}})_4]$  (data for 100 K). The shift in positions of reflexes and differences in intensities are the result of different measurement temperatures – possibly a polymorphic transition occurs. Cu  $\text{K}\alpha$ .

Table S1. The absorption bands observed in the FTIR spectra of  $M[Al(OC(CF_3)_3)_4]$  salts,  $[cm^{-1}]$ . The values reported for tetraalkylammonium salts (TAA), i.e.  $[Me_4N]$ ,  $[Et_4N]$  and  $[Bu_4N]$ , are listed for comparison. vw – very weak, w – weak, m – medium, s – strong, vs – very strong, sh – shoulder, br – broad, R – Raman active mode for the anions of higher symmetry.

| Li      | Na      | Ag      | K       | Rb      | Cs      | $NH_4^*$    | $N_2H_5^*$  | NO      | TAA <sup>S15</sup> |
|---------|---------|---------|---------|---------|---------|-------------|-------------|---------|--------------------|
| 456 vw  | 455 vw  | 439 vw  | 447 vw  | 448 w   | 447 w   | 448 s       | 448 s, sh   | 447 vw  | 446–449            |
| 481 vw  | 480 vw  | 468 vw  | -       | -       |         | -           | -           | -       |                    |
| 538 vw  | 538 vw  | 537 vw  | 535 w   | 536 w   | 537 w   | 537 m       | 536 w       | 535 vw  | 536–538            |
| 550 vw  | 550 vw  | 554 vw  | -       | -       |         | -           | -           | -       |                    |
| 565 vw  | 565 vw  | 568 vw  | 562 vw  | 561 w   | 561 vw  | 562 m       | 560 w       | 560 vw  | 559–562            |
| 572 vw  | 573 vw  | 578 vw  | 573 vw  | 572 vw  | 572 vw  | 571 w       | 572 vw      | 573 vw  | 571–573            |
| 581 vw  | 581 vw  |         | -       | -       |         | -           | -           | -       |                    |
| 726 m   | 726 m   | 728 m   | 726 s   | 726 m   | 727 s   | 727 vs      | 727 s       | 726 s   | 726–727            |
| 729 m   | 729 sh  | -       | -       | -       |         | -           | -           | -       |                    |
| 745 vw  | 745 vw  | 745 vw  | -       | -       |         | -           | -           | -       | 744–747 R          |
| 756 vw  | 756 vw  |         | 757 vw  | 755 vw  | 756 vw  | 756 w       | 755 w       | 757 vw  | 755–756            |
| 760 vw  | 759 vw  | 760 vw  | -       | -       |         | -           | -           | -       |                    |
| 799 vw  | 800 vw  | 800 vw  |         |         |         |             |             |         | 794–799 R          |
|         |         |         | -       | -       |         |             |             | -       |                    |
| 844 vw  | 844 vw  | -       | 833 vw  | 834 vw  | 834 vw  | 834 w       | 836 w       | 832 vw  | 830–833            |
| 864 vw  | 866 vw  | 864 vw  | -       |         |         |             | 878 vw      | -       |                    |
|         |         |         |         |         |         |             |             |         |                    |
| 963 sh  | 961 sh  |         | 967 sh  | 963 s   | 964 vs  | 962 vs      | 971 vs      |         | 967 sh             |
| 976 s   | 976 vs  | 974 s   | 972 vs  | 975 m   | 976 s   | 975 vs      |             | 972 s   | 973–976            |
|         |         |         |         |         |         | 1022 vw, sh | 1021        |         |                    |
|         |         |         |         |         |         |             | 1050 vw     |         |                    |
| 1108 vw | 1115 vw | 1129 vw | 1122 w  | 1125w   | 1130 vw | 1120 w      | 1127 vw, sh | 1119 vw | 1133–1139 R        |
| -       | -       | 1155 vw | 1155 w  | -       |         |             |             | -       |                    |
| 1175 m  | 1175 w  | 1176 vw | 1173 m  | 1185 m  | 1183 m  | 1177 w      | 1183 m, sh  | 1171 w  | 1163–1176          |
| 1216 s  | 1216 s  | 1215 s  | 1208 vs | 1225 vs | 1224 vs | 1224 vs     | 1220 vs     | 1208 vs | 1217–1223          |
| 1230 sh |         |         | 1218 sh |         |         |             |             |         |                    |
| 1249 vs | 1251 vs | 1253 vs | 1253 vs | 1247 vs | 1247 vs | 1245 vs     | 1249 vs     | 1252 vs | 1236–1240          |
|         |         |         |         | 1265 s  | 1266 vs | 1266 s      |             |         |                    |
| 1277 s  | 1272 vs | 1272 vs | 1278 vs |         | 1276 vs | 1276 s      | 1273 vs     | 1279 vs | 1271–1274          |
| 1302 sh | 1301 sh | 1302 w  | 1298 s  | 1297 m  | 1306 s  | 1301 s      | 1300 s      | 1298 s  | 1296–1299          |
| 1352 vw | 1355 vw | 1367 vw | 1355 m  | 1354 w  | 1357 m  | 1354 m      | 1355 m      | 1354 w  | 1349–1353          |
|         |         |         |         |         |         |             | 1517 w      |         |                    |
|         |         |         |         |         |         | 1434 m      | 1540 vw     |         |                    |
|         |         |         |         |         |         |             | 1604 w, br  |         |                    |
|         |         |         |         |         |         |             | 3186 vw     |         |                    |
|         |         |         |         |         |         |             | 3205 w      |         |                    |
|         |         |         |         |         |         | 3236 sh, br | 3246 w      |         |                    |
|         |         |         |         |         |         | 3324 m, br  | 3300 m      |         |                    |
|         |         |         |         |         |         | 3434 sh, br | 3327 sh     |         |                    |
|         |         |         |         |         |         |             | 3413 w      |         |                    |

\* samples measured on AgCl windows

### Raman spectra with the most important bands marked

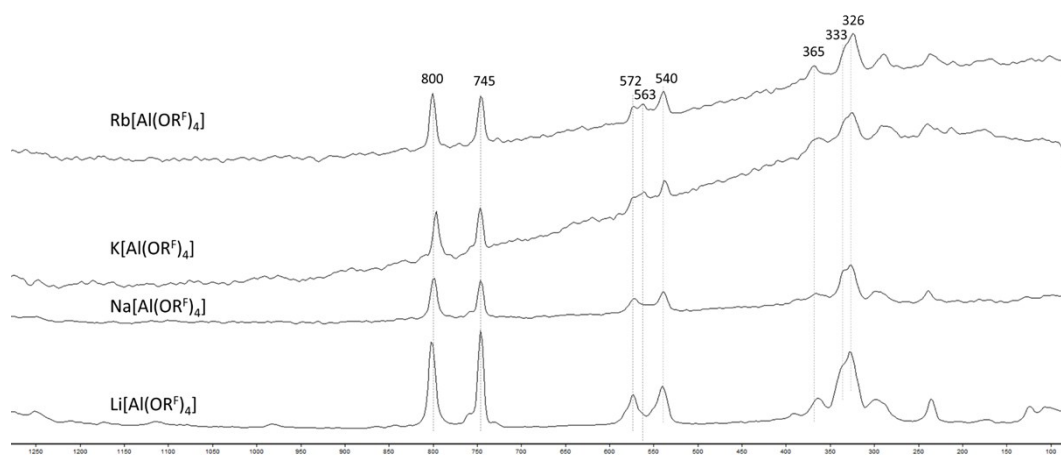

## NMR spectra

### $\text{NH}_4[\text{Al}(\text{OR}^f)_4]$

#### 19F

6544.2.fid  
6544-19F  
NH4PF\_MD030B

| Parameter                 | Value               |
|---------------------------|---------------------|
| 1 Origin                  | Bruker BioSpin GmbH |
| 2 Owner                   | felix               |
| 3 Instrument              | spect               |
| 4 Solvent                 | Acetone             |
| 5 Temperature             | 298.1               |
| 6 Pulse Sequence          | zg_pi               |
| 7 Experiment              | 1D                  |
| 8 Number of Scans         | 12                  |
| 9 Relaxation Delay        | 0.0000              |
| 10 Pulse Width            | 15.0000             |
| 11 Acquisition Time       | 4.2992              |
| 12 Acquisition Date       | 2019-10-11T09:29:12 |
| 13 Spectrometer Frequency | 470.62              |
| 14 Spectral Width         | 15243.9             |
| 15 Nucleus                | 19F                 |
| 16 Acquired Size          | 65536               |
| 17 Spectral Size          | 65536               |

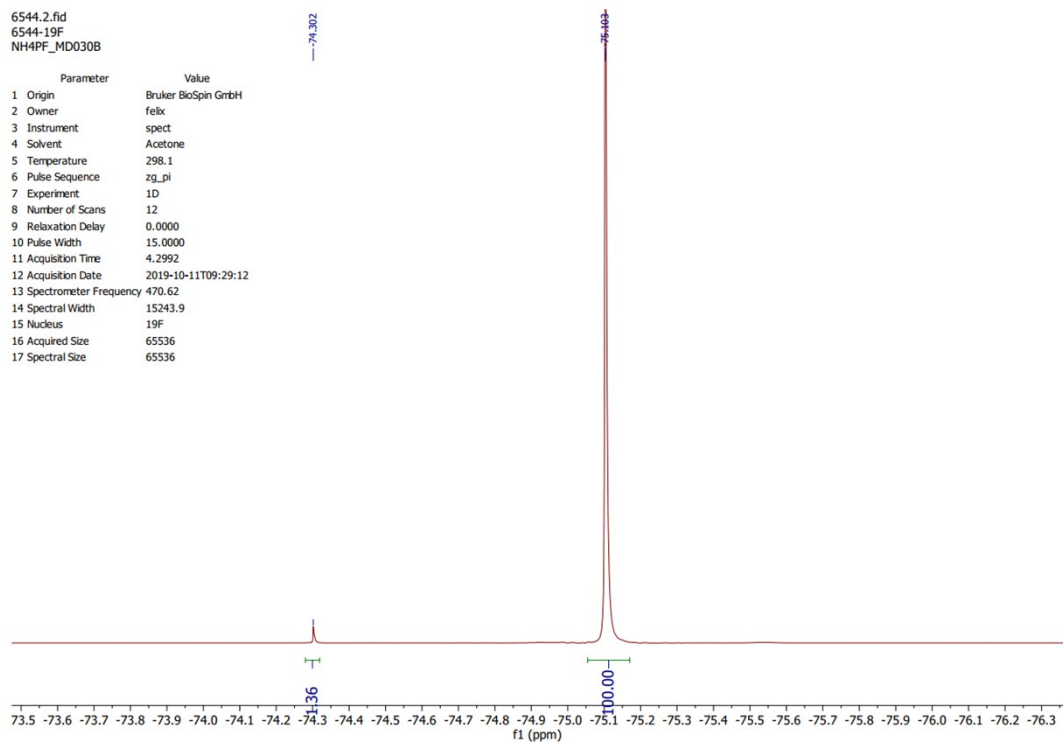

#### 27Al

6544.3.fid  
6544-27Al  
NH4PF\_MD030B

| Parameter                 | Value               |
|---------------------------|---------------------|
| 1 Origin                  | Bruker BioSpin GmbH |
| 2 Owner                   | felix               |
| 3 Instrument              | spect               |
| 4 Solvent                 | Acetone             |
| 5 Temperature             | 298.2               |
| 6 Pulse Sequence          | zg_pi_CPD           |
| 7 Experiment              | 1D                  |
| 8 Number of Scans         | 8                   |
| 9 Relaxation Delay        | 1.5000              |
| 10 Pulse Width            | 16.0000             |
| 11 Acquisition Time       | 1.6078              |
| 12 Acquisition Date       | 2019-10-11T09:27:16 |
| 13 Spectrometer Frequency | 130.34              |
| 14 Spectral Width         | 20380.4             |
| 15 Nucleus                | 27Al                |
| 16 Acquired Size          | 32768               |
| 17 Spectral Size          | 65536               |

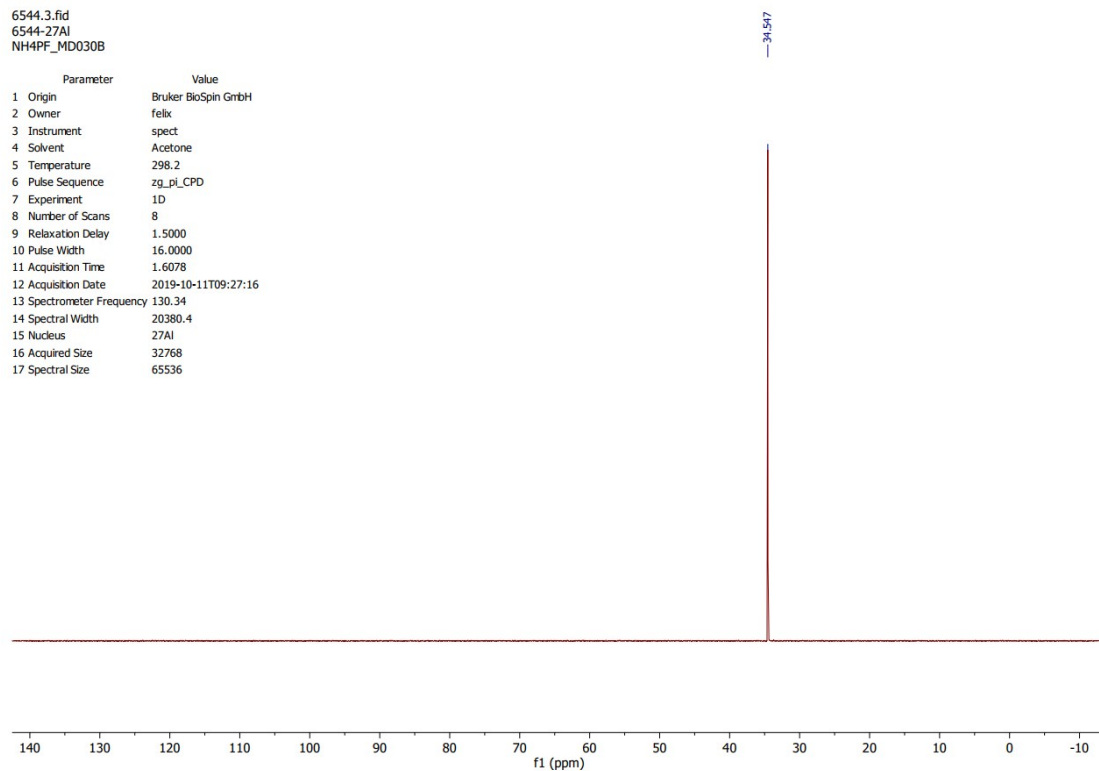

# 1H

6544.1.fid  
6544-1H  
NH4PF\_MD030B

| Parameter                 | Value               |
|---------------------------|---------------------|
| 1 Origin                  | Bruker BioSpin GmbH |
| 2 Owner                   | felix               |
| 3 Instrument              | spect               |
| 4 Solvent                 | Acetone             |
| 5 Temperature             | 298.2               |
| 6 Pulse Sequence          | zg30                |
| 7 Experiment              | 1D                  |
| 8 Number of Scans         | 24                  |
| 9 Relaxation Delay        | 0.0000              |
| 10 Pulse Width            | 11.3000             |
| 11 Acquisition Time       | 3.2768              |
| 12 Acquisition Date       | 2019-10-11T09:35:25 |
| 13 Spectrometer Frequency | 500.20              |
| 14 Spectral Width         | 10000.0             |
| 15 Nucleus                | 1H                  |
| 16 Acquired Size          | 32768               |
| 17 Spectral Size          | 65536               |

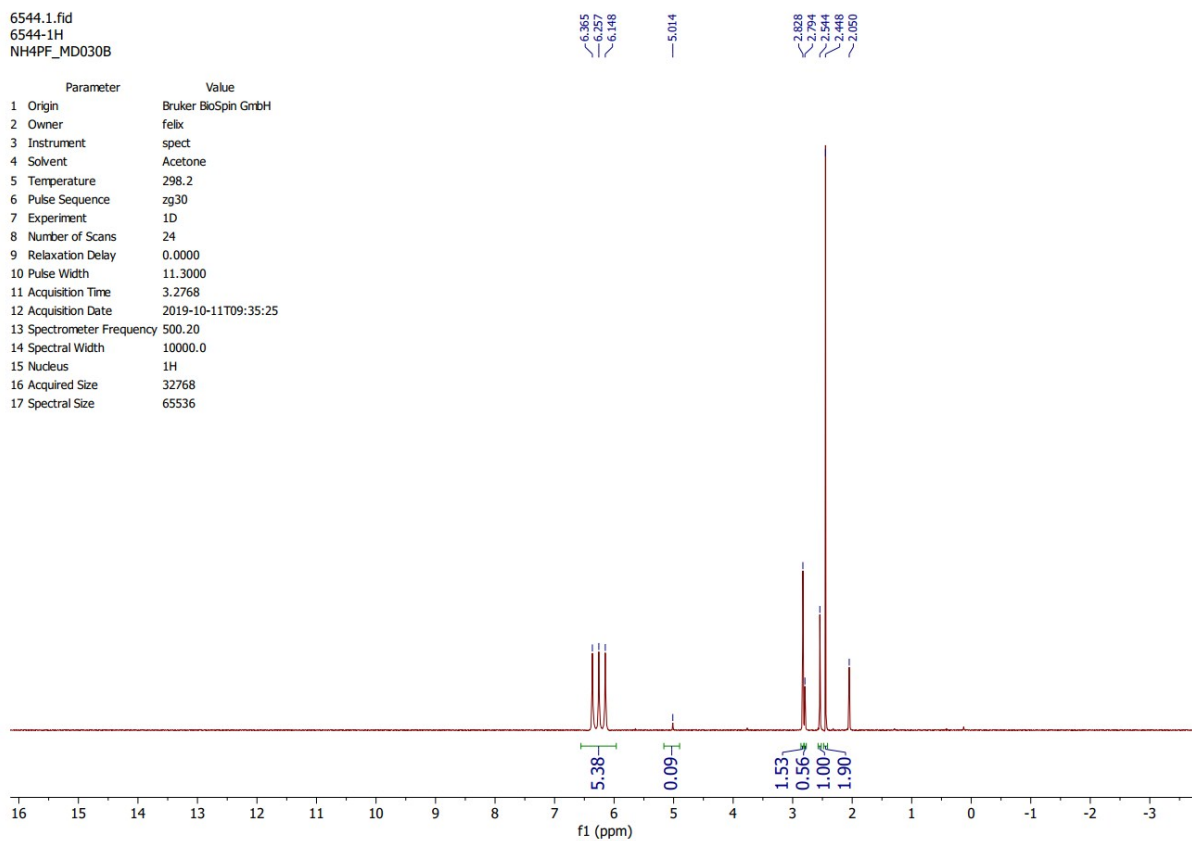

The signals between 2 and 3 ppm come from impurities of  $(\text{CD}_3)_2\text{CO}$ . The origin of the weak signal at 5.014 ppm remains unknown.

# $N_2H_5[Al(OR^F)_4]$

## 19F

6545.2.fid  
6545-19F  
N2H5PF\_MD042B

| Parameter                 | Value               |
|---------------------------|---------------------|
| 1 Origin                  | Bruker BioSpin GmbH |
| 2 Owner                   | felix               |
| 3 Instrument              | spect               |
| 4 Solvent                 | Acetone             |
| 5 Temperature             | 298.2               |
| 6 Pulse Sequence          | zg_pi               |
| 7 Experiment              | 1D                  |
| 8 Number of Scans         | 8                   |
| 9 Relaxation Delay        | 0.0000              |
| 10 Pulse Width            | 15.0000             |
| 11 Acquisition Time       | 4.2992              |
| 12 Acquisition Date       | 2019-10-11T11:17:37 |
| 13 Spectrometer Frequency | 470.62              |
| 14 Spectral Width         | 15243.9             |
| 15 Nucleus                | 19F                 |
| 16 Acquired Size          | 65536               |
| 17 Spectral Size          | 65536               |

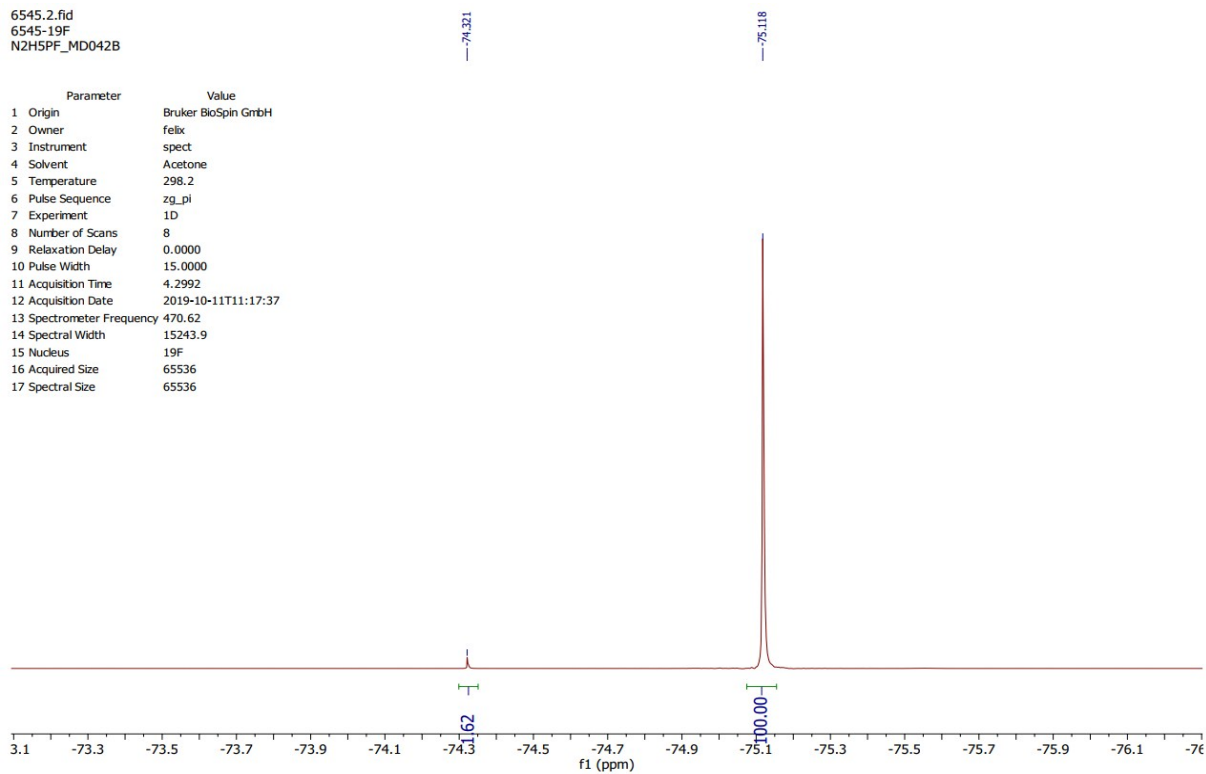

## 1H

6545.1.fid  
6545-1H  
N2H5PF\_MD042B

| Parameter                 | Value               |
|---------------------------|---------------------|
| 1 Origin                  | Bruker BioSpin GmbH |
| 2 Owner                   | felix               |
| 3 Instrument              | spect               |
| 4 Solvent                 | Acetone             |
| 5 Temperature             | 298.1               |
| 6 Pulse Sequence          | zg30                |
| 7 Experiment              | 1D                  |
| 8 Number of Scans         | 16                  |
| 9 Relaxation Delay        | 0.0000              |
| 10 Pulse Width            | 11.3000             |
| 11 Acquisition Time       | 3.2768              |
| 12 Acquisition Date       | 2019-10-11T11:15:23 |
| 13 Spectrometer Frequency | 500.20              |
| 14 Spectral Width         | 10000.0             |
| 15 Nucleus                | 1H                  |
| 16 Acquired Size          | 32768               |
| 17 Spectral Size          | 65536               |

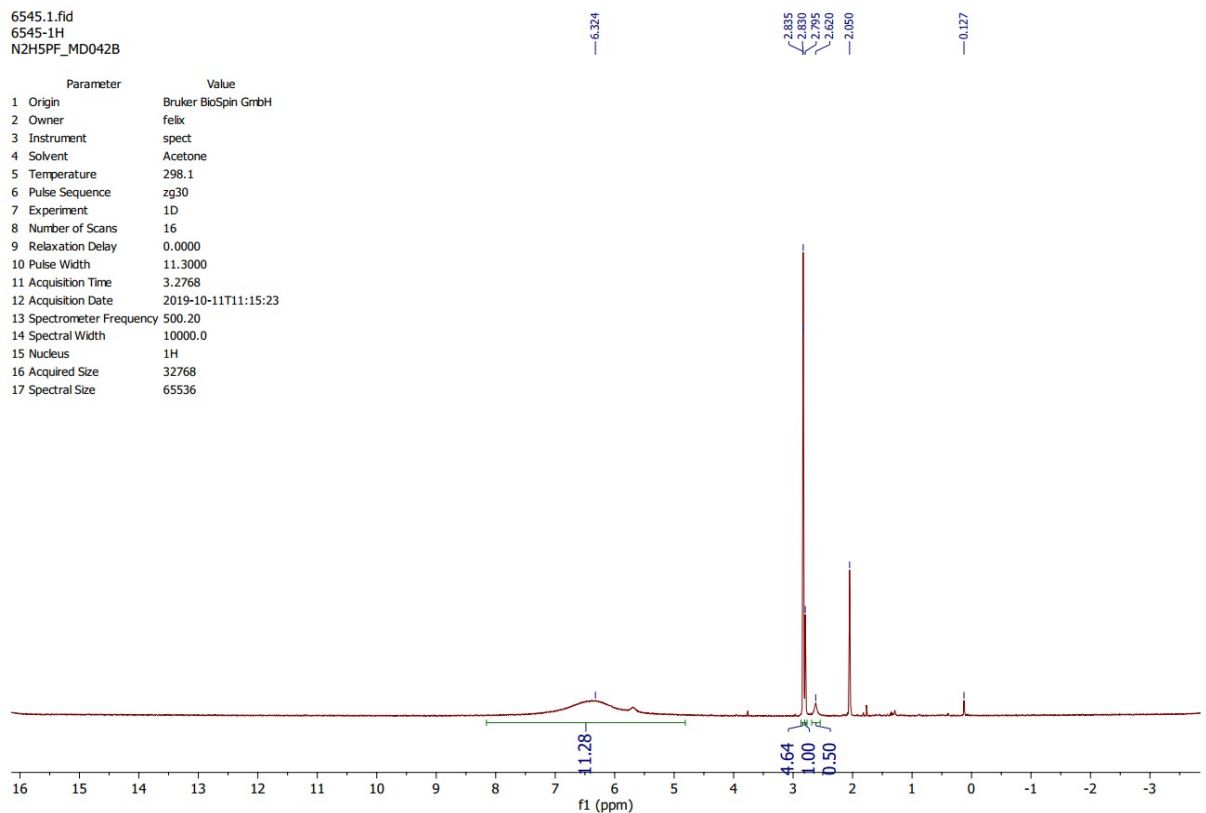



# 27Al

6545.3.fid  
6545-27Al  
N2H5PF\_MD042B

| Parameter                 | Value               |
|---------------------------|---------------------|
| 1 Origin                  | Bruker BioSpin GmbH |
| 2 Owner                   | felix               |
| 3 Instrument              | spect               |
| 4 Solvent                 | Acetone             |
| 5 Temperature             | 298.1               |
| 6 Pulse Sequence          | zg_pi_CPD           |
| 7 Experiment              | 1D                  |
| 8 Number of Scans         | 4                   |
| 9 Relaxation Delay        | 1.5000              |
| 10 Pulse Width            | 16.0000             |
| 11 Acquisition Time       | 1.6078              |
| 12 Acquisition Date       | 2019-10-11T11:19:02 |
| 13 Spectrometer Frequency | 130.34              |
| 14 Spectral Width         | 20380.4             |
| 15 Nucleus                | 27Al                |
| 16 Acquired Size          | 32768               |
| 17 Spectral Size          | 65536               |

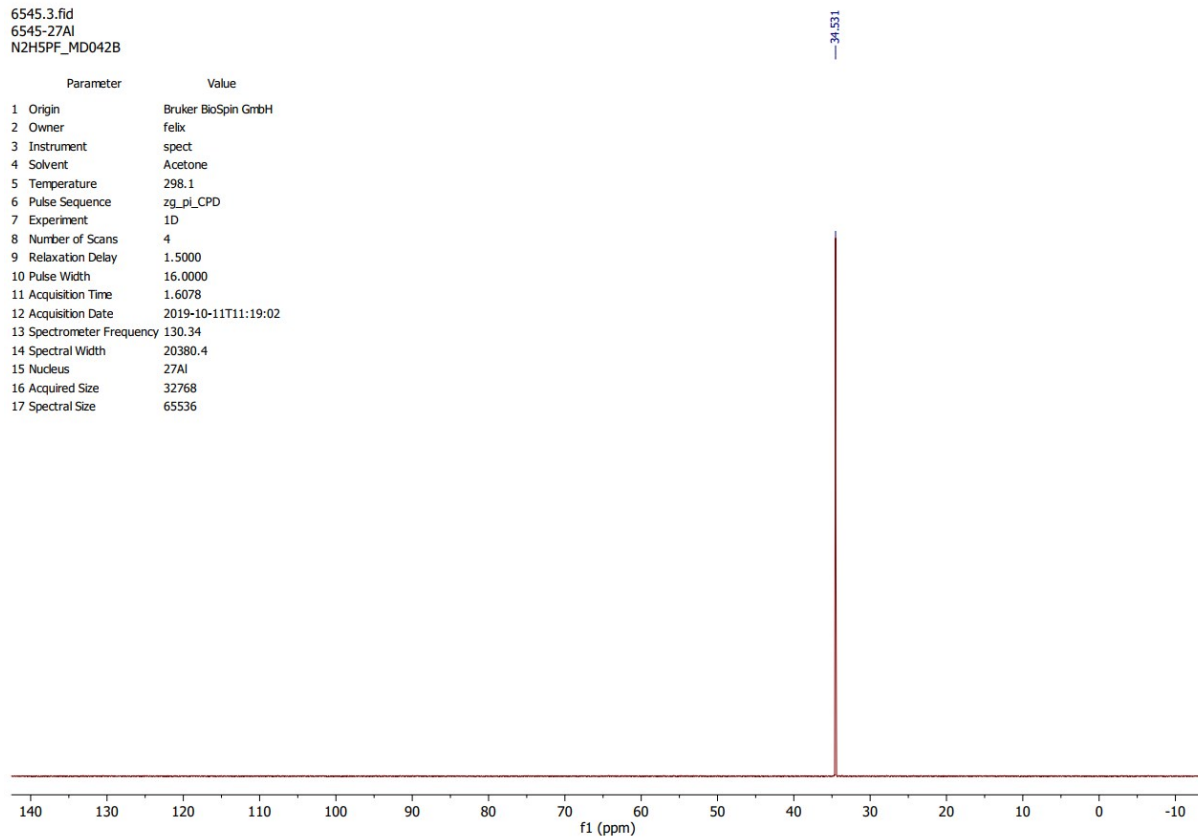

# Li[Al(OR<sup>F</sup>)<sub>4</sub>]

## 19F

| Parameter                 | Value                     |
|---------------------------|---------------------------|
| 1 Comment                 | 23903-19F<br>LIPF_09.2019 |
| 2 Origin                  | Bruker BioSpin GmbH       |
| 3 Solvent                 | CDCl <sub>3</sub>         |
| 4 Temperature             | 298.1                     |
| 5 Pulse Sequence          | zg_pi                     |
| 6 Number of Scans         | 100                       |
| 7 Receiver Gain           | 200                       |
| 8 Relaxation Delay        | 0.0000                    |
| 9 Pulse Width             | 15.0000                   |
| 10 Acquisition Time       | 0.9787                    |
| 11 Acquisition Date       | 2019-10-10T13:36:15       |
| 12 Modification Date      | 2019-10-10T13:36:16       |
| 13 G to G'                | 1.00000000                |
| 14 Echo Delay             | 0.0000                    |
| 15 Gradient Duration      | 0.0000                    |
| 16 Spectrometer Frequency | 282.47                    |
| 17 Spectral Width         | 66964.3                   |
| 18 Lowest Frequency       | -61729.2                  |
| 19 Nucleus                | 19F                       |
| 20 Acquired Size          | 65536                     |
| 21 Spectral Size          | 131072                    |

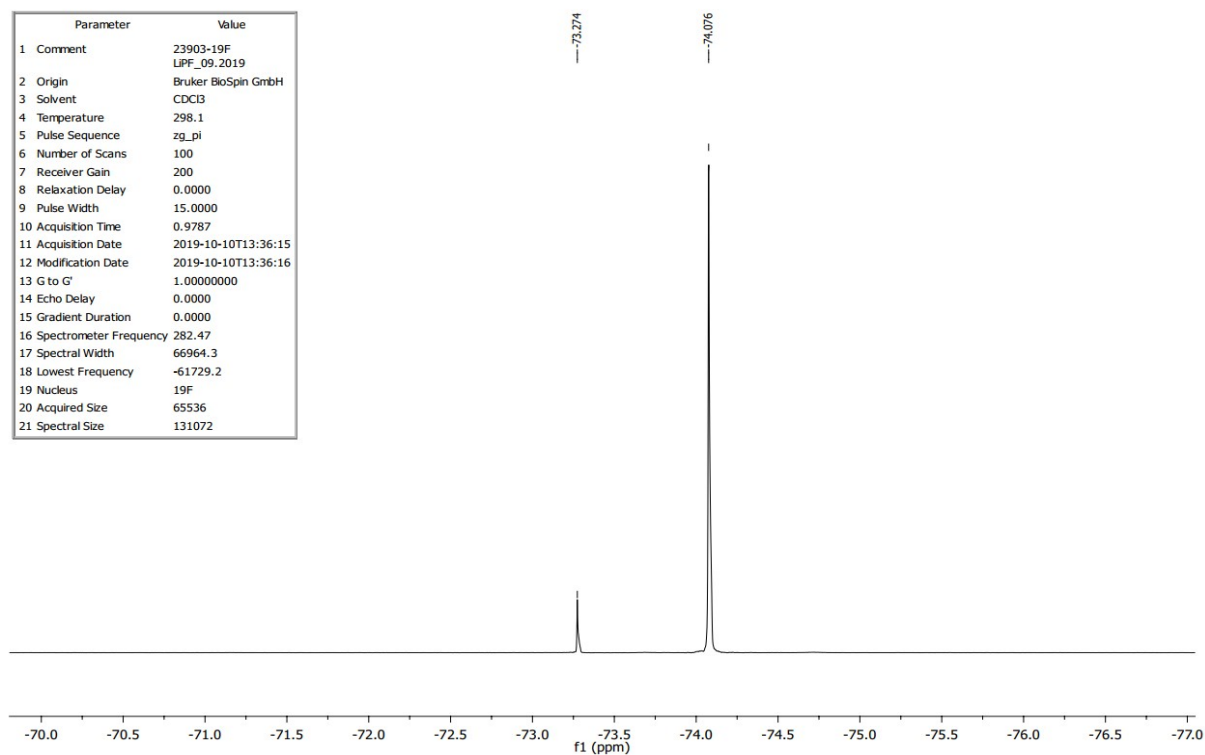

## 27Al

| Parameter                 | Value                       |
|---------------------------|-----------------------------|
| 1 Comment                 | 23903-127Al<br>LIPF_09.2019 |
| 2 Origin                  | Bruker BioSpin GmbH         |
| 3 Solvent                 | CDCl <sub>3</sub>           |
| 4 Temperature             | 298.2                       |
| 5 Pulse Sequence          | zg_pi_CPD                   |
| 6 Number of Scans         | 12                          |
| 7 Receiver Gain           | 179                         |
| 8 Relaxation Delay        | 1.5000                      |
| 9 Pulse Width             | 20.5500                     |
| 10 Acquisition Time       | 1.3981                      |
| 11 Acquisition Date       | 2019-10-10T14:40:18         |
| 12 Modification Date      | 2019-10-10T14:40:27         |
| 13 G to G'                | 1.00000000                  |
| 14 Echo Delay             | 0.0000                      |
| 15 Gradient Duration      | 0.0000                      |
| 16 Spectrometer Frequency | 78.22                       |
| 17 Spectral Width         | 23437.5                     |
| 18 Lowest Frequency       | -3896.5                     |
| 19 Nucleus                | 27Al                        |
| 20 Acquired Size          | 32768                       |
| 21 Spectral Size          | 65536                       |

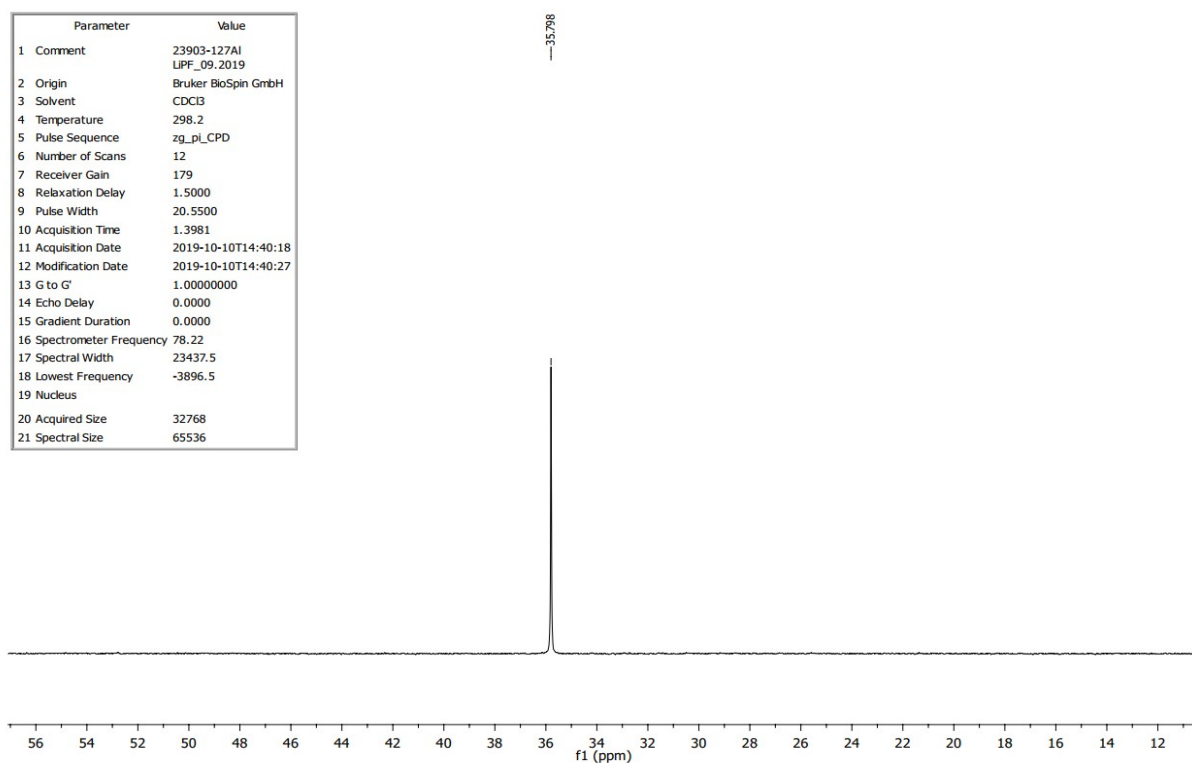

# Na[Al(OR<sup>F</sup>)<sub>4</sub>]

## 19F

| Parameter                 | Value               |
|---------------------------|---------------------|
| 1 Comment                 | 23904-19F<br>NaPF   |
| 2 Origin                  | Bruker BioSpin GmbH |
| 3 Solvent                 | CDCl <sub>3</sub>   |
| 4 Temperature             | 298.2               |
| 5 Pulse Sequence          | zg_pi               |
| 6 Number of Scans         | 32                  |
| 7 Receiver Gain           | 200                 |
| 8 Relaxation Delay        | 0.0000              |
| 9 Pulse Width             | 15.0000             |
| 10 Acquisition Time       | 0.9787              |
| 11 Acquisition Date       | 2019-10-10T13:46:50 |
| 12 Modification Date      | 2019-10-10T13:47:16 |
| 13 G to G'                | 1.0000000           |
| 14 Echo Delay             | 0.0000              |
| 15 Gradient Duration      | 0.0000              |
| 16 Spectrometer Frequency | 282.47              |
| 17 Spectral Width         | 66964.3             |
| 18 Lowest Frequency       | -61729.2            |
| 19 Nucleus                | 19F                 |
| 20 Acquired Size          | 65536               |
| 21 Spectral Size          | 131072              |

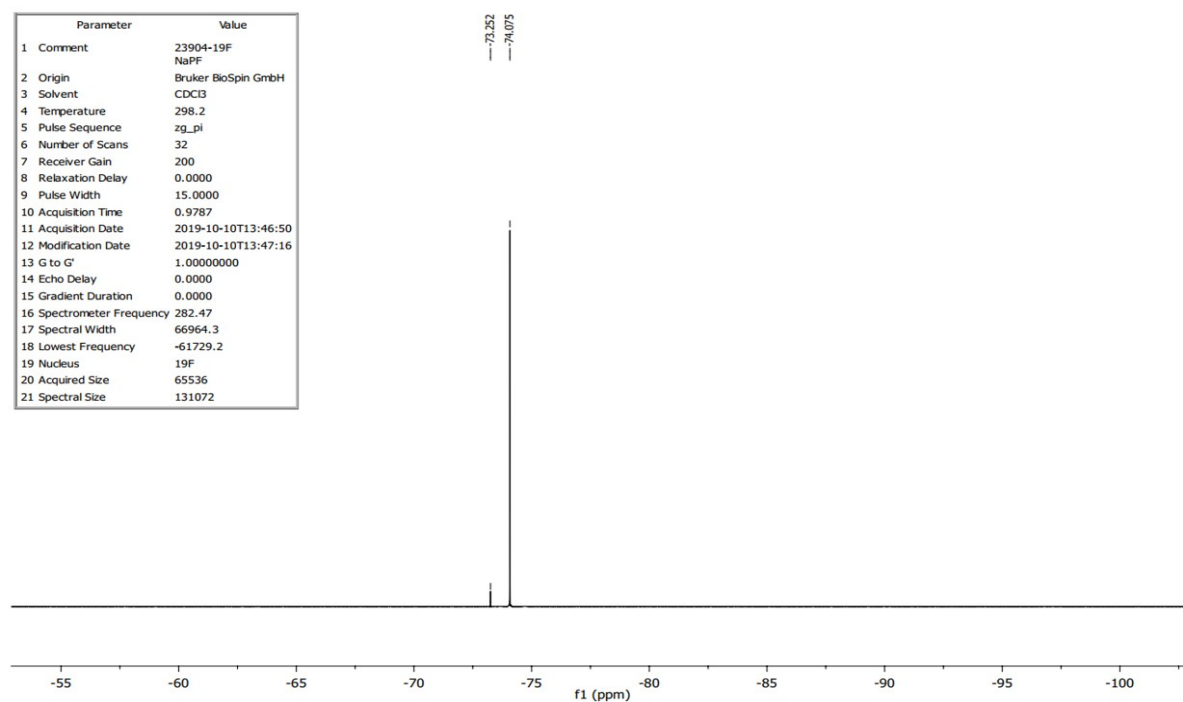

## 27Al

| Parameter                 | Value               |
|---------------------------|---------------------|
| 1 Comment                 | 23904-127Al<br>NaPF |
| 2 Origin                  | Bruker BioSpin GmbH |
| 3 Solvent                 | CDCl <sub>3</sub>   |
| 4 Temperature             | 298.2               |
| 5 Pulse Sequence          | zg_pl_CPD           |
| 6 Number of Scans         | 24                  |
| 7 Receiver Gain           | 200                 |
| 8 Relaxation Delay        | 1.5000              |
| 9 Pulse Width             | 20.5500             |
| 10 Acquisition Time       | 1.3981              |
| 11 Acquisition Date       | 2019-10-10T14:42:15 |
| 12 Modification Date      | 2019-10-10T14:42:48 |
| 13 G to G'                | 1.0000000           |
| 14 Echo Delay             | 0.0000              |
| 15 Gradient Duration      | 0.0000              |
| 16 Spectrometer Frequency | 78.22               |
| 17 Spectral Width         | 23437.5             |
| 18 Lowest Frequency       | -3896.5             |
| 19 Nucleus                | 27Al                |
| 20 Acquired Size          | 32768               |
| 21 Spectral Size          | 65536               |

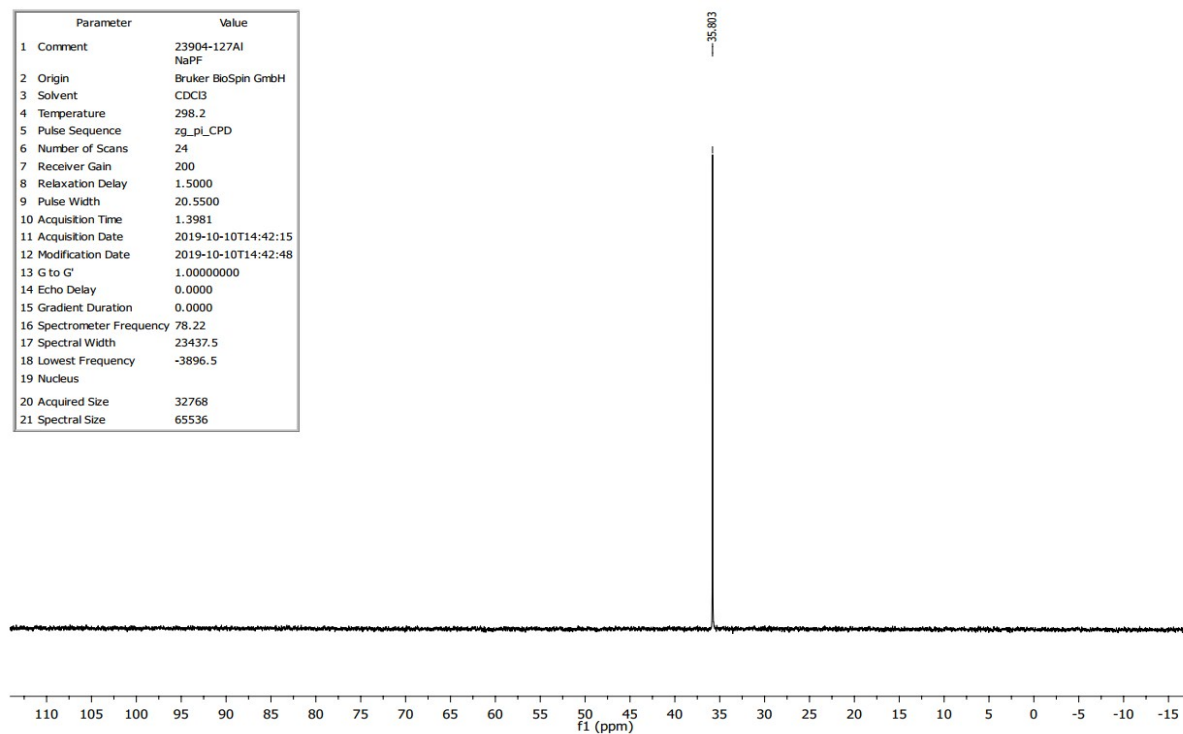

# K[Al(OR<sup>F</sup>)<sub>4</sub>]

## 19F

| Parameter                 | Value                           |
|---------------------------|---------------------------------|
| 1 Comment                 | 23905-19F<br>KPF                |
| 2 Origin                  | Bruker BioSpin GmbH             |
| 3 Solvent                 | CD <sub>2</sub> Cl <sub>2</sub> |
| 4 Temperature             | 298.2                           |
| 5 Pulse Sequence          | zg_pi                           |
| 6 Number of Scans         | 32                              |
| 7 Receiver Gain           | 200                             |
| 8 Relaxation Delay        | 0.0000                          |
| 9 Pulse Width             | 15.0000                         |
| 10 Acquisition Time       | 0.9787                          |
| 11 Acquisition Date       | 2019-10-10T14:25:12             |
| 12 Modification Date      | 2019-10-10T14:25:40             |
| 13 G to G'                | 1.00000000                      |
| 14 Echo Delay             | 0.0000                          |
| 15 Gradient Duration      | 0.0000                          |
| 16 Spectrometer Frequency | 282.47                          |
| 17 Spectral Width         | 66964.3                         |
| 18 Lowest Frequency       | -61729.2                        |
| 19 Nucleus                | 19F                             |
| 20 Acquired Size          | 65536                           |
| 21 Spectral Size          | 131072                          |

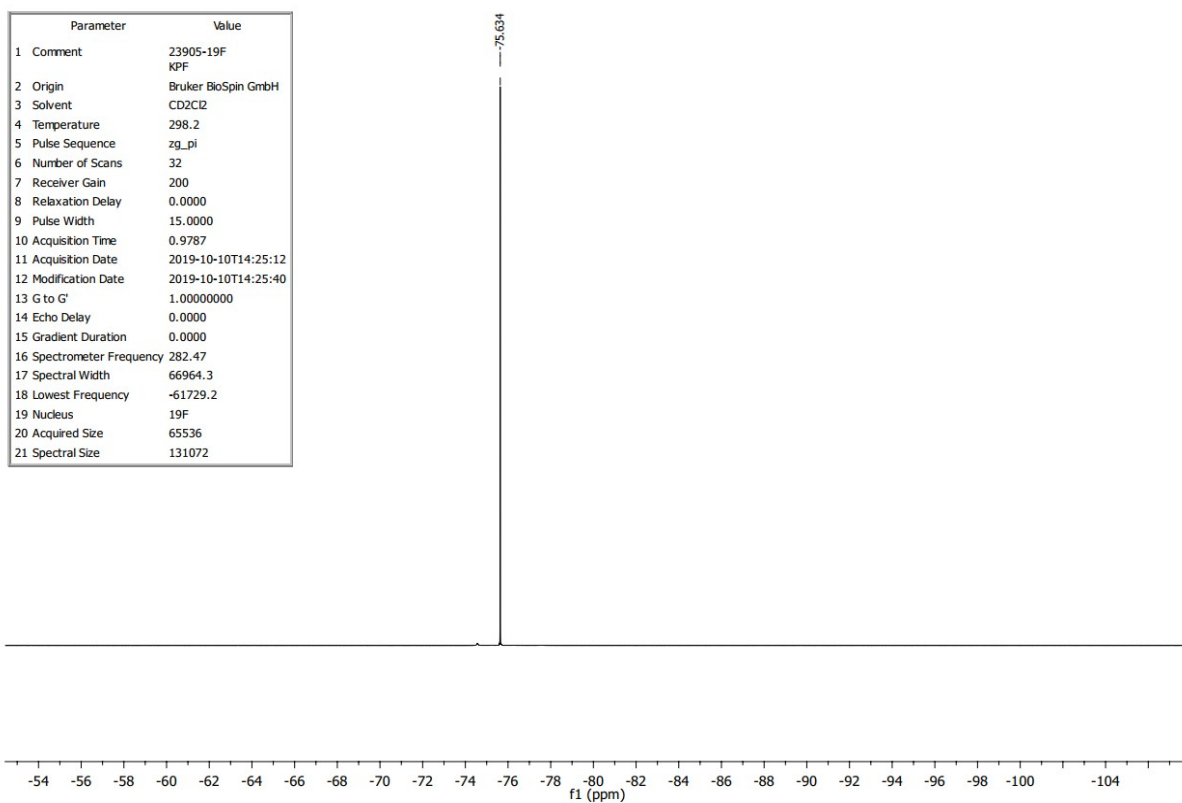

## 27Al

| Parameter                 | Value                           |
|---------------------------|---------------------------------|
| 1 Comment                 | 23905-27Al<br>KPF               |
| 2 Origin                  | Bruker BioSpin GmbH             |
| 3 Solvent                 | CD <sub>2</sub> Cl <sub>2</sub> |
| 4 Temperature             | 298.2                           |
| 5 Pulse Sequence          | zg_pi_CPD                       |
| 6 Number of Scans         | 12                              |
| 7 Receiver Gain           | 200                             |
| 8 Relaxation Delay        | 1.5000                          |
| 9 Pulse Width             | 20.5500                         |
| 10 Acquisition Time       | 1.3981                          |
| 11 Acquisition Date       | 2019-10-10T14:43:57             |
| 12 Modification Date      | 2019-10-10T14:44:27             |
| 13 G to G'                | 1.00000000                      |
| 14 Echo Delay             | 0.0000                          |
| 15 Gradient Duration      | 0.0000                          |
| 16 Spectrometer Frequency | 78.22                           |
| 17 Spectral Width         | 23437.5                         |
| 18 Lowest Frequency       | -3896.5                         |
| 19 Nucleus                | 27Al                            |
| 20 Acquired Size          | 32768                           |
| 21 Spectral Size          | 65536                           |

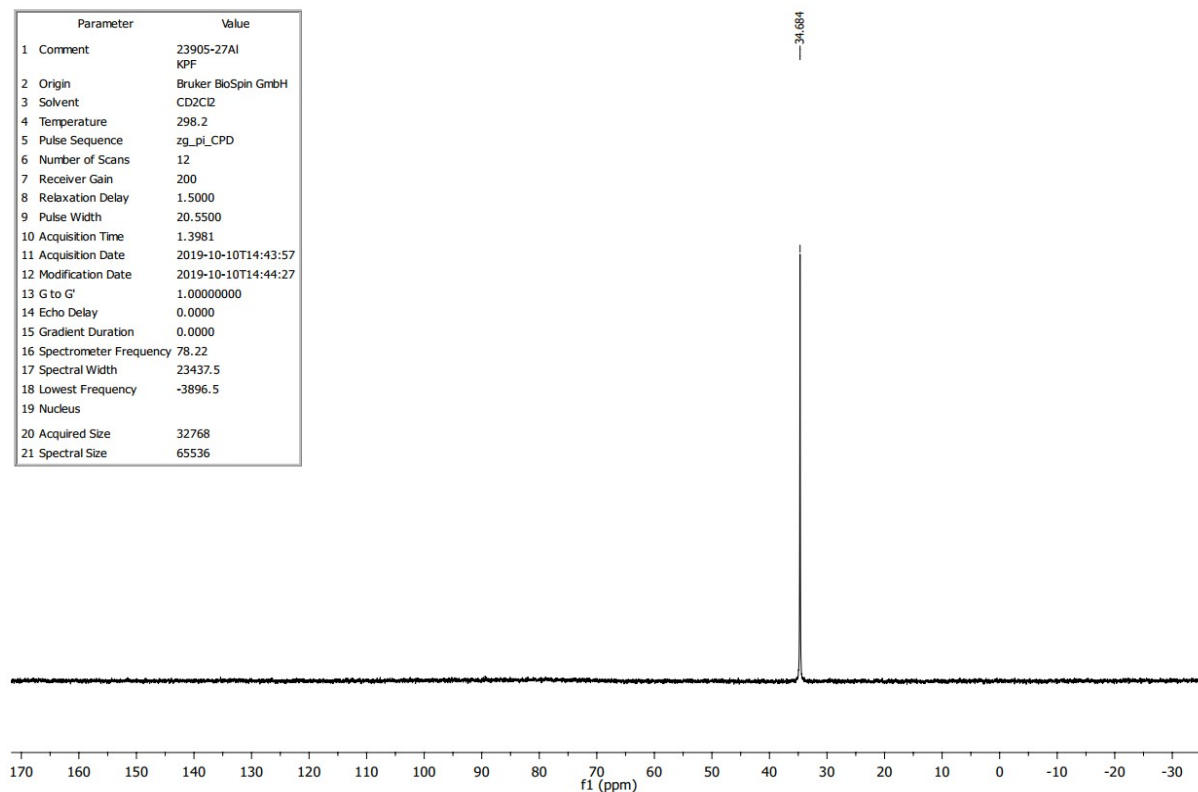

# Rb[Al(OR<sup>F</sup>)<sub>4</sub>]

## 19F

| Parameter                 | Value                           |
|---------------------------|---------------------------------|
| 1 Comment                 | 23906-19F<br>RbPF               |
| 2 Origin                  | Bruker BioSpin GmbH             |
| 3 Solvent                 | CD <sub>2</sub> Cl <sub>2</sub> |
| 4 Temperature             | 298.1                           |
| 5 Pulse Sequence          | zg_pi                           |
| 6 Number of Scans         | 32                              |
| 7 Receiver Gain           | 200                             |
| 8 Relaxation Delay        | 0.0000                          |
| 9 Pulse Width             | 15.0000                         |
| 10 Acquisition Time       | 0.9787                          |
| 11 Acquisition Date       | 2019-10-10T14:30:10             |
| 12 Modification Date      | 2019-10-10T14:30:11             |
| 13 G to G'                | 1.00000000                      |
| 14 Echo Delay             | 0.0000                          |
| 15 Gradient Duration      | 0.0000                          |
| 16 Spectrometer Frequency | 282.44                          |
| 17 Spectral Width         | 66964.3                         |
| 18 Lowest Frequency       | -61729.2                        |
| 19 Nucleus                | 19F                             |
| 20 Acquired Size          | 65536                           |
| 21 Spectral Size          | 131072                          |

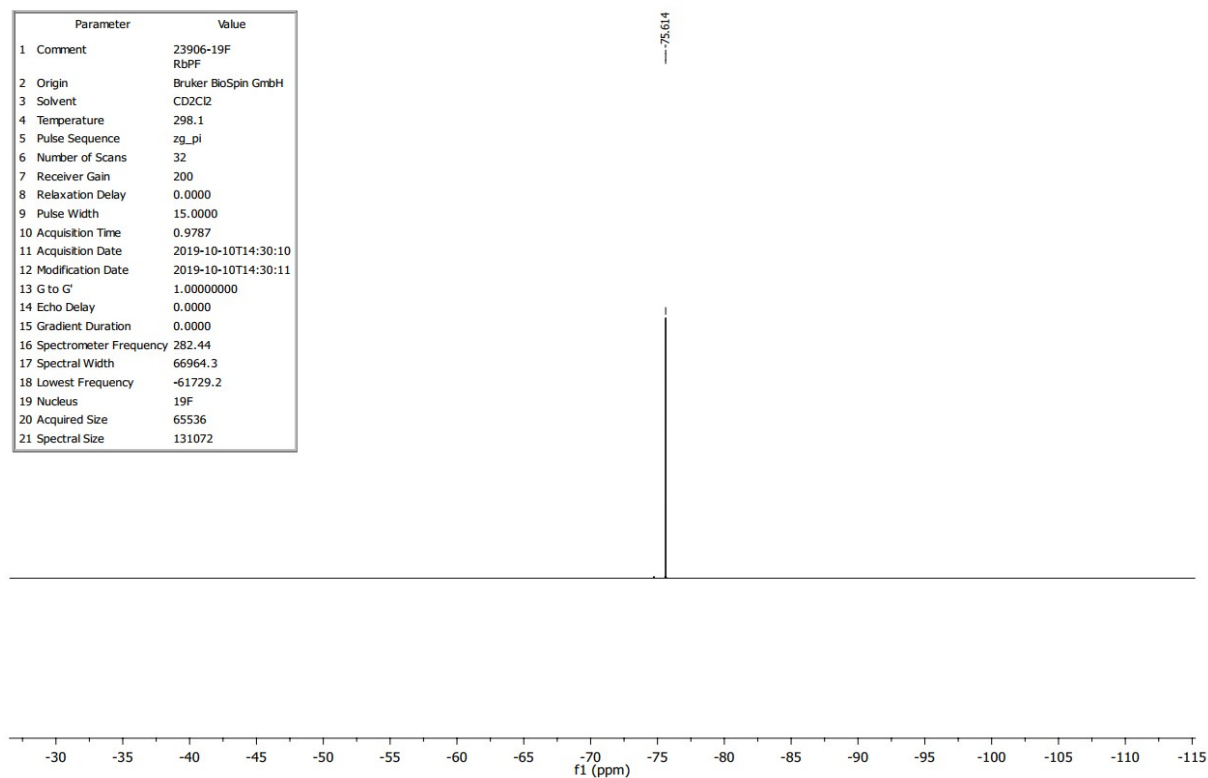

## 27Al

| Parameter                 | Value                           |
|---------------------------|---------------------------------|
| 1 Comment                 | 23906-27Al<br>RbPF              |
| 2 Origin                  | Bruker BioSpin GmbH             |
| 3 Solvent                 | CD <sub>2</sub> Cl <sub>2</sub> |
| 4 Temperature             | 298.2                           |
| 5 Pulse Sequence          | zg_pi_CPD                       |
| 6 Number of Scans         | 9                               |
| 7 Receiver Gain           | 200                             |
| 8 Relaxation Delay        | 1.5000                          |
| 9 Pulse Width             | 20.5500                         |
| 10 Acquisition Time       | 1.3981                          |
| 11 Acquisition Date       | 2019-10-10T14:46:50             |
| 12 Modification Date      | 2019-10-10T14:47:05             |
| 13 G to G'                | 1.00000000                      |
| 14 Echo Delay             | 0.0000                          |
| 15 Gradient Duration      | 0.0000                          |
| 16 Spectrometer Frequency | 78.22                           |
| 17 Spectral Width         | 23437.5                         |
| 18 Lowest Frequency       | -3896.5                         |
| 19 Nucleus                | 27Al                            |
| 20 Acquired Size          | 32768                           |
| 21 Spectral Size          | 65536                           |

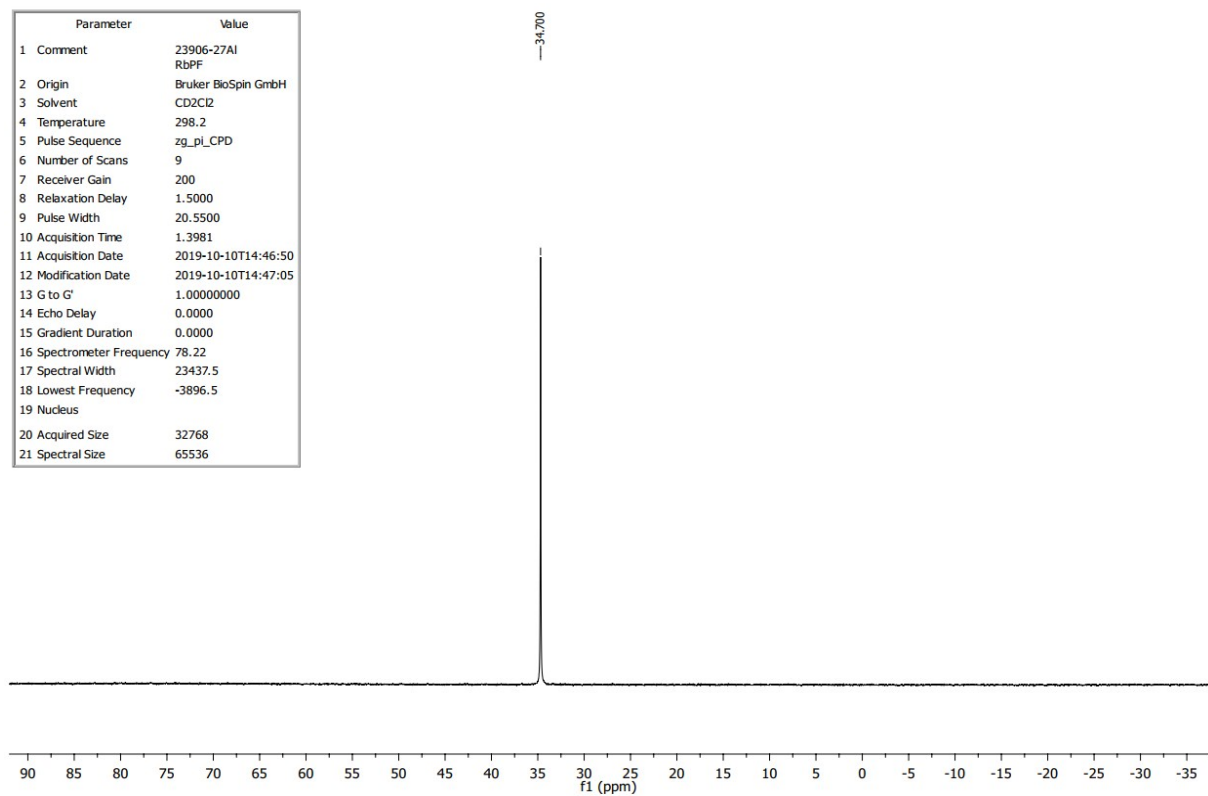

# Cs[Al(OR<sup>F</sup>)<sub>4</sub>]

## 19F

| Parameter                 | Value                           |
|---------------------------|---------------------------------|
| 1 Comment                 | 23907-19F<br>CsPF               |
| 2 Origin                  | Bruker BioSpin GmbH             |
| 3 Solvent                 | CD <sub>2</sub> Cl <sub>2</sub> |
| 4 Temperature             | 298.1                           |
| 5 Pulse Sequence          | zg_pi                           |
| 6 Number of Scans         | 32                              |
| 7 Receiver Gain           | 200                             |
| 8 Relaxation Delay        | 0.0000                          |
| 9 Pulse Width             | 15.0000                         |
| 10 Acquisition Time       | 0.9787                          |
| 11 Acquisition Date       | 2019-10-10T14:33:21             |
| 12 Modification Date      | 2019-10-10T14:33:21             |
| 13 G to G'                | 1.00000000                      |
| 14 Echo Delay             | 0.0000                          |
| 15 Gradient Duration      | 0.0000                          |
| 16 Spectrometer Frequency | 282.47                          |
| 17 Spectral Width         | 66964.3                         |
| 18 Lowest Frequency       | -61729.2                        |
| 19 Nucleus                | 19F                             |
| 20 Acquired Size          | 65536                           |
| 21 Spectral Size          | 131072                          |

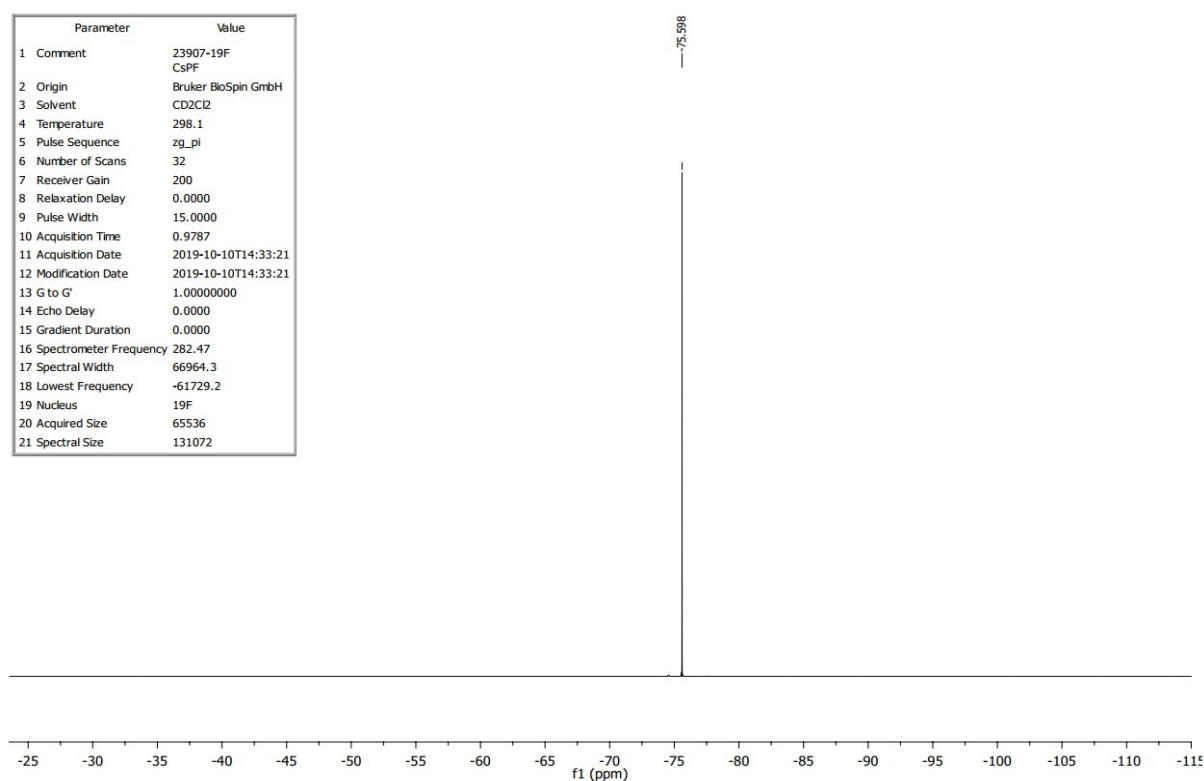

## 27Al

| Parameter                 | Value                           |
|---------------------------|---------------------------------|
| 1 Comment                 | 23907-27Al<br>CsPF              |
| 2 Origin                  | Bruker BioSpin GmbH             |
| 3 Solvent                 | CD <sub>2</sub> Cl <sub>2</sub> |
| 4 Temperature             | 298.2                           |
| 5 Pulse Sequence          | zg_pi_CPD                       |
| 6 Number of Scans         | 13                              |
| 7 Receiver Gain           | 200                             |
| 8 Relaxation Delay        | 1.5000                          |
| 9 Pulse Width             | 20.5500                         |
| 10 Acquisition Time       | 1.3981                          |
| 11 Acquisition Date       | 2019-10-10T14:49:32             |
| 12 Modification Date      | 2019-10-10T14:49:50             |
| 13 G to G'                | 1.00000000                      |
| 14 Echo Delay             | 0.0000                          |
| 15 Gradient Duration      | 0.0000                          |
| 16 Spectrometer Frequency | 78.22                           |
| 17 Spectral Width         | 23437.5                         |
| 18 Lowest Frequency       | -3896.5                         |
| 19 Nucleus                | 27Al                            |
| 20 Acquired Size          | 32768                           |
| 21 Spectral Size          | 65536                           |

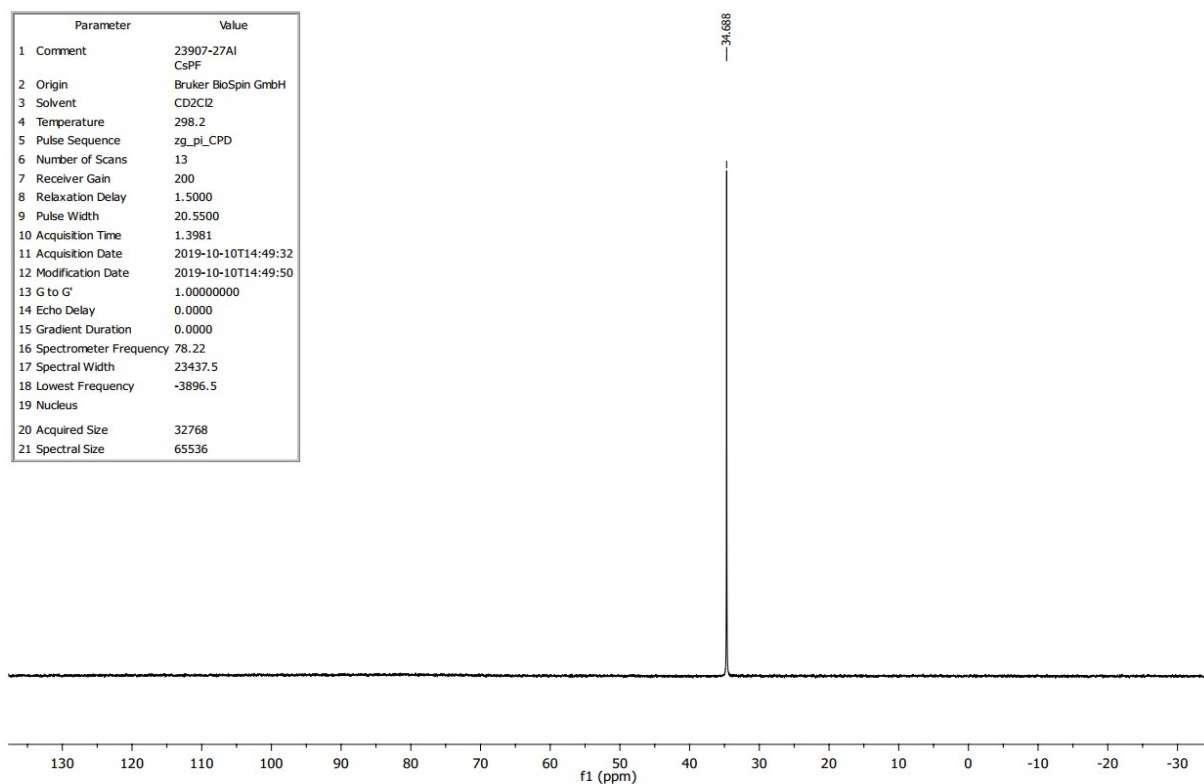

### 3. Crystallographic data

Table S2. Crystallographic data for refined structures.

| Compound                                 | Li[Al(OR <sup>F</sup> ) <sub>4</sub> ]                | Na[Al(OR <sup>F</sup> ) <sub>4</sub> ] | K[Al(OR <sup>F</sup> ) <sub>4</sub> ] | Rb[Al(OR <sup>F</sup> ) <sub>4</sub> ] | Cs[Al(OR <sup>F</sup> ) <sub>4</sub> ] | NH <sub>4</sub> [Al(OR <sup>F</sup> ) <sub>4</sub> ] | N <sub>2</sub> H <sub>5</sub> [Al(OR <sup>F</sup> ) <sub>4</sub> ] | N <sub>2</sub> H <sub>7</sub> [Al(OR <sup>F</sup> ) <sub>4</sub> ] | Ag[ <i>alfal</i> ]                 | Cu[ <i>alfal</i> ] |
|------------------------------------------|-------------------------------------------------------|----------------------------------------|---------------------------------------|----------------------------------------|----------------------------------------|------------------------------------------------------|--------------------------------------------------------------------|--------------------------------------------------------------------|------------------------------------|--------------------|
| K <sub>α</sub>                           | 0.71073 (Mo)                                          | 0.71073 (Mo)                           | 0.71073 (Mo)                          | 0.71073 (Mo)                           | 0.71073 (Mo)                           | 1.54184 (Cu)                                         | 1.54184 (Cu)                                                       | 0.71073 (Mo)                                                       | 0.71073 (Mo)                       | 1.54184 (Cu)       |
| Temperature (K)                          | 100                                                   | 190                                    | 100                                   | 100                                    | 100                                    | 100                                                  | 100                                                                | 100                                                                | 100                                | 100                |
| Space group                              | <i>P</i> 2 <sub>1</sub> 2 <sub>1</sub> 2 <sub>1</sub> | <i>P</i> 2 <sub>1</sub> / <i>c</i>     | <i>P</i> 2 <sub>1</sub> / <i>c</i>    | <i>P</i> 1                             | <i>P</i> 1                             | <i>P</i> 1                                           | <i>P</i> 1                                                         | <i>P</i> 1̄                                                        | <i>P</i> 2 <sub>1</sub> / <i>c</i> | <i>P</i> 1̄        |
| Z                                        | 4                                                     | 4                                      | 8                                     | 2                                      | 4                                      | 2                                                    | 2                                                                  | 8                                                                  | 4                                  | 2                  |
| <i>a</i> (Å)                             | 9.9680(5)                                             | 13.6410(8)                             | 23.8816(11)                           | 9.6213(7)                              | 17.1845(18)                            | 9.6278(4)                                            | 9.6450(4)                                                          | 17.4972(8)                                                         | 21.151(2)                          | 10.5661(5)         |
| <i>b</i> (Å)                             | 13.4495(6)                                            | 10.1222(6)                             | 12.9259(6)                            | 10.4768(7)                             | 17.4964(18)                            | 10.5021(4)                                           | 10.6675(5)                                                         | 17.5074(7)                                                         | 10.2666(10)                        | 10.7463(4)         |
| <i>c</i> (Å)                             | 21.0791(10)                                           | 21.3566(13)                            | 20.6284(10)                           | 16.8127(12)                            | 18.6544(19)                            | 16.8670(4)                                           | 17.0803(8)                                                         | 20.3760(9)                                                         | 21.257(2)                          | 22.2844(8)         |
| α (°)                                    | 90                                                    | 90                                     | 90                                    | 81.079(4)                              | 105.940(2)                             | 81.237(3)                                            | 82.791(4)                                                          | 91.583(2)                                                          | 90                                 | 82.600(3)          |
| β (°)                                    | 90                                                    | 89.957(3)                              | 115.546(2)                            | 73.385(3)                              | 105.366(2)                             | 73.421(3)                                            | 73.622(4)                                                          | 91.488(2)                                                          | 112.868(3)                         | 87.100(3)          |
| γ (°)                                    | 90                                                    | 90                                     | 90                                    | 62.701(3)                              | 113.601(2)                             | 62.778(4)                                            | 63.240(4)                                                          | 105.979(2)                                                         | 90                                 | 61.460(4)          |
| <i>V</i> (Å <sup>3</sup> )               | 2826.0(2)                                             | 2948.9(3)                              | 5745.3(5)                             | 1442.53(18)                            | 4472.2(8)                              | 1453.04(10)                                          | 1505.47(13)                                                        | 5994.7(5)                                                          | 4253.3(7)                          | 2204.15(17)        |
| ρ <sub>calc.</sub> (g cm <sup>-3</sup> ) | 2.290                                                 | 2.230                                  | 2.327                                 | 2.423                                  | 2.451                                  | 2.243                                                | 2.201                                                              | 2.221                                                              | 2.485                              | 2.333              |
| μ <sub>exp.</sub> (mm <sup>-1</sup> )    | 0.340                                                 | 0.341                                  | 0.480                                 | 2.010                                  | 1.526                                  | 3.163                                                | 3.075                                                              | 0.326                                                              | 0.801                              | 3.877              |
| ϑ <sub>max</sub> (°)                     | 27.517                                                | 23.2155                                | 26.667                                | 27.658                                 | 30.768                                 | 72.051                                               | 75.288                                                             | 26.097                                                             | 28.740                             | 68.252             |
| <i>R</i> <sub>1</sub>                    | 2.83%                                                 | 3.78%                                  | 3.30%                                 | 2.23%                                  | 4.62%                                  | 5.64%                                                | 4.55%                                                              | 4.95%                                                              | 2.90%                              | 7.19%              |
| <i>wR</i> <sub>2</sub>                   | 7.37%                                                 | 10.25%                                 | 8.20%                                 | 4.77%                                  | 10.71%                                 | 15.06%                                               | 12.08%                                                             | 12.90%                                                             | 6.50%                              | 19.46%             |
| <i>Goof</i>                              | 1.156                                                 | 1.052                                  | 1.034                                 | 1.036                                  | 1.043                                  | 1.056                                                | 1.039                                                              | 1.033                                                              | 1.134                              | 1.026              |
| Crystal size (mm×mm×mm)                  | 0.20×0.30×0.38                                        | 0.08×0.08×0.25                         | 0.07×0.15×0.15                        | 0.10×0.12×0.13                         | 0.08×0.10×0.20                         | 0.08×0.14×0.19                                       | 0.21×0.28×0.35                                                     | 0.20×0.23×0.24                                                     | 0.10×0.25×0.40                     | 0.05×0.12×0.15     |
| Crystal color                            | colorless                                             | colorless                              | colorless                             | colorless                              | colorless                              | colorless                                            | colorless                                                          | colorless                                                          | colorless                          | colorless          |
| CCDC No.                                 | 1960194                                               | 1960196                                | 1960195                               | 1960197                                | 1960198                                | 1960459                                              | 1960205                                                            | 1960204                                                            | 1960514                            | 1960199            |

## 4. Supplementary data and figures for description of the crystal structures

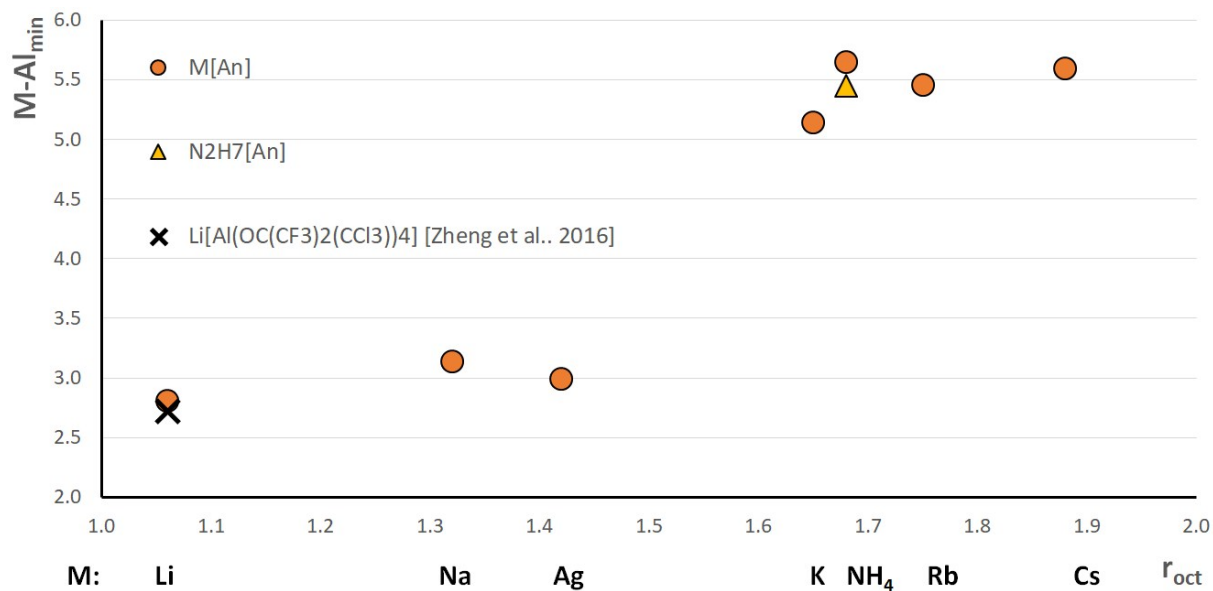

Figure S11. The minimal M–Al distances [Å] observed in the crystals in the function of crystallographic octahedral radii [Å].

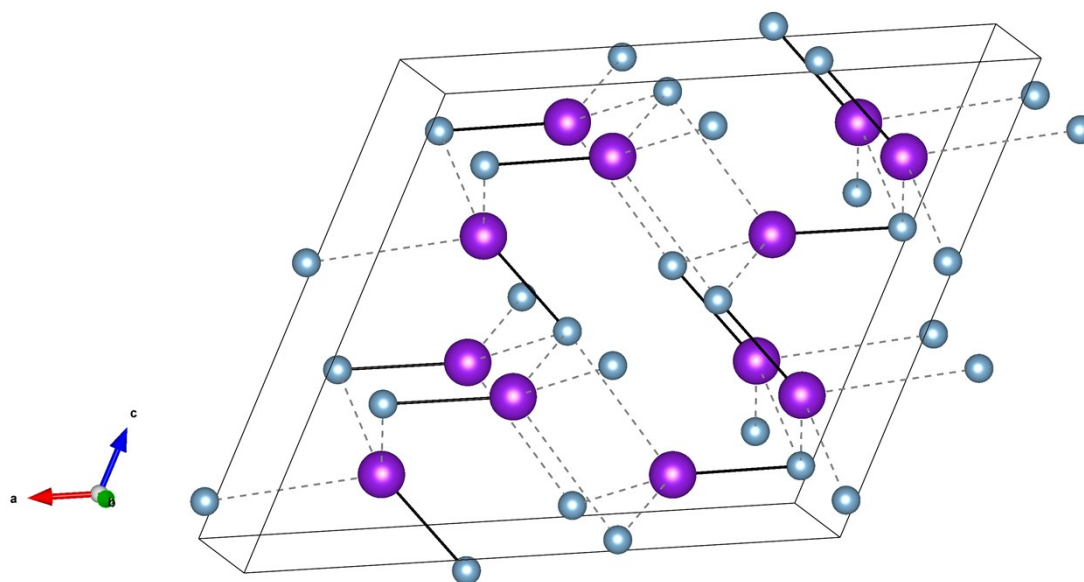

Figure S12. View of KAl sublattice in the crystal structure of  $K[Al(OR^F)_4]$ . Purple: K, blue: Al. Black solid line: the shortest K-Al distance (ca. 5.2 Å), dashed grey lines: K-Al distances in the range of 7–8 Å.



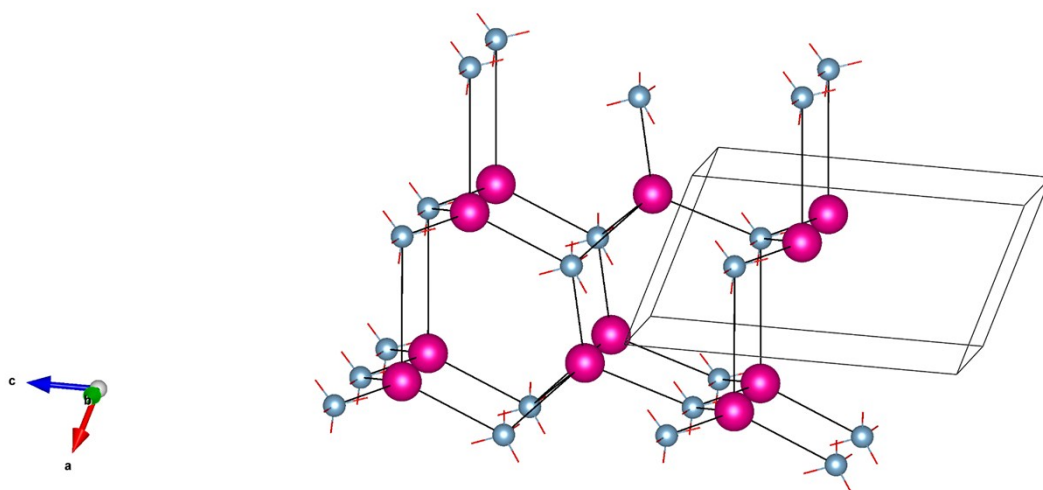

Figure S13. View of RbAl sublattice in the crystal structure of  $\text{Rb}[\text{Al}(\text{OR}^{\text{F}})_4]$ . Pink: Rb, blue: Al. Similar arrangement has also been observed for  $\text{M} = \text{Cs}$  and  $\text{NH}_4$ .

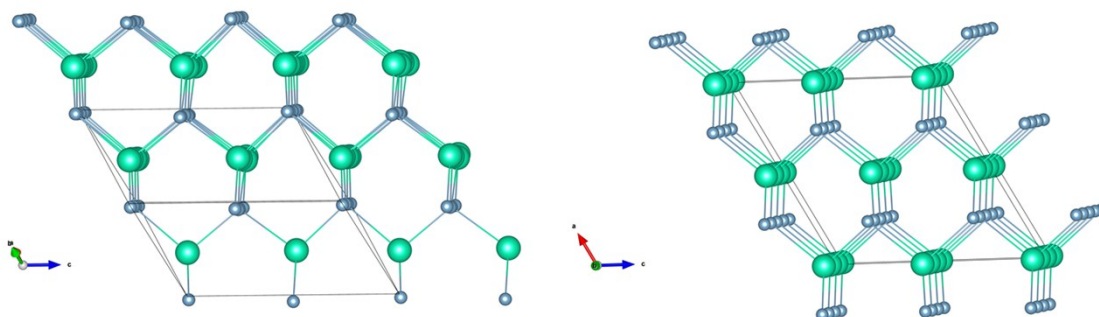

Figure S14. The view of CsAl sublattice in  $\text{Cs}[\text{Al}(\text{OR}^{\text{F}})_4]$  at 100 K (left) and 200 K (right).<sup>S14</sup> The orientation of both structures is set to see the modulation in the arrangement of Cs and Al in the former one. Celadon: Cs, blue: Al.

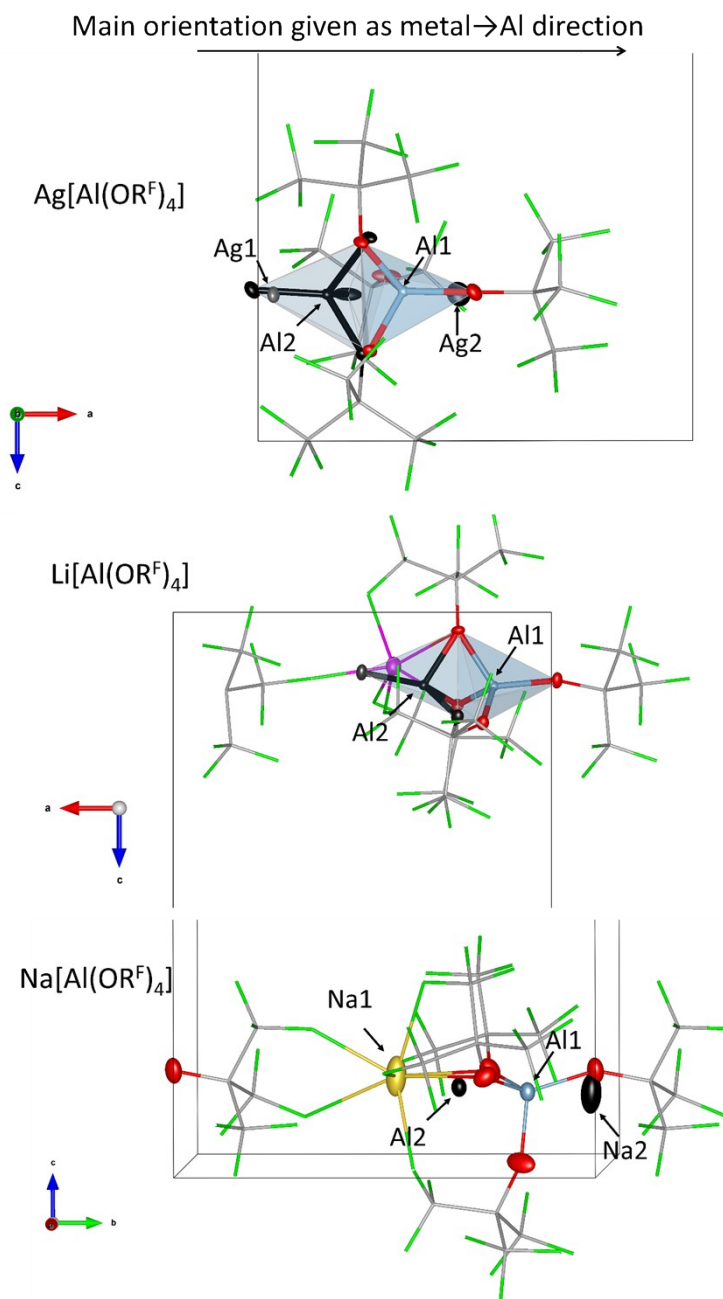

Figure S15. Visualization of the disorder in  $\{M[Al(OR^F)_4]\}_\infty$  chains ( $M=Ag$ ,<sup>56</sup> Li, Na). The atoms from main orientation are in colour, while localized atoms from the opposite orientation are in black. Disorder in  $-OR^F$  groups, thermal ellipsoids of C and F atoms are omitted for clarity.

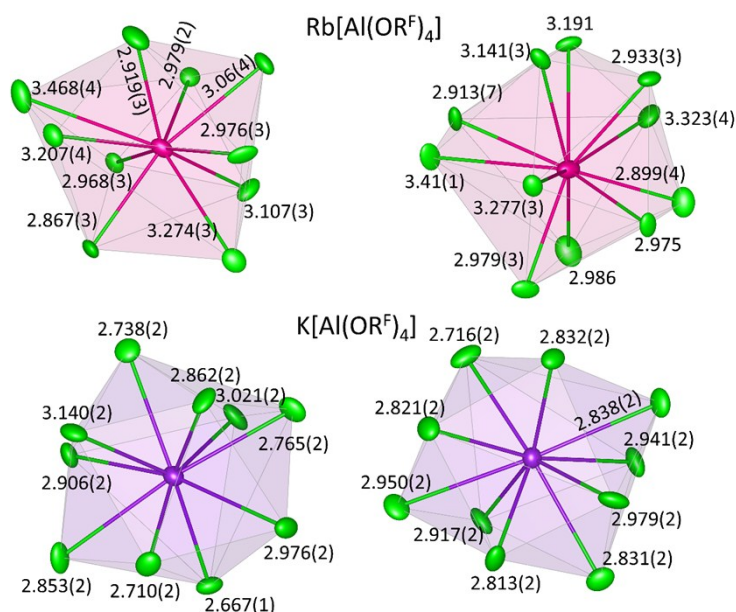

Figure S16. Coordination spheres of  $\text{K}^+$  (purple) and  $\text{Rb}^+$  (violet) in their  $[\text{Al}(\text{OR}^{\text{F}})_4]^-$  salts. Bond lengths given in Å.

### $\text{Cs}[\text{Al}(\text{OR}^{\text{F}})_4]$ - toluene adduct

Due to the weakly coordinating character and large size of  $[\text{Al}(\text{OR}^{\text{F}})_4]^-$ , even the large  $\text{Cs}^+$  is able to form a fairly stable solvate with a toluene molecule.  $\text{Cs}$  coordinates in  $\eta^6$ -fashion with very long  $\text{Cs}-\text{C}$  distances exceeding 3.44 Å and  $\text{Cs}$ -aromatic ring distance of ca. 3.2 Å, which are in agreement with the DFT predictions (B3LYP/def2-TZVP/D3BJ). Toluene molecules are arranged in a way that the methyl group is pointing perpendicular to the aromatic ring of its neighbor enabling a  $\text{CH}\cdots\pi$  interaction at ca. 3.6 Å (see Figure S17), which is the most thermodynamically favored mode of bonding between two methyl-substituted aromatic molecules.<sup>S16</sup> Coordination of the toluene molecules renders the structure layered, if weak toluene-toluene interactions are neglected. On the basis of the DFT calculations, the  $\text{Cs}^+$ -toluene dissociation energy is  $\Delta_r H = -50 \text{ kJ mol}^{-1}$  and  $\Delta_r G = -26 \text{ kJ mol}^{-1}$ . Based on the Jenkins equation,<sup>S17</sup> the energetic cost of lattice expansion upon toluene coordination is estimated at 15  $\text{kJ mol}^{-1}$ . For smaller anions the value is much higher, even higher than the coordination energy. *E.g.*, for the  $[\text{SbF}_6]^-$  anion, the lattice energy change would be 96  $\text{kJ mol}^{-1}$  which significantly outweighs the  $\text{Cs}^+$ -toluene interaction energy.

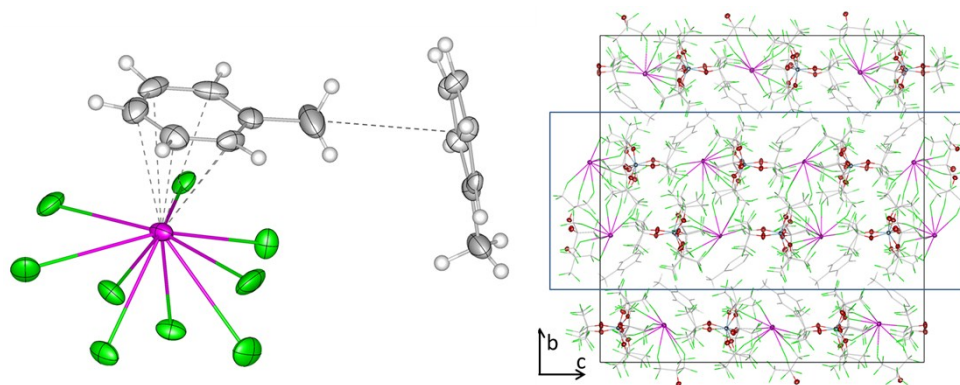

Figure S17. Views of the crystal structure of  $\text{Cs}(\text{C}_6\text{H}_5\text{CH}_3)[\text{Al}(\text{OR}^{\text{F}})_4]$ . Left: coordination sphere Cs including the neighbouring toluene molecule; right: the view of the crystal structure along a axis with one layer marked with blue rectangle.

Table S3. Crystallographic data for refined structure of  $\text{Cs}(\text{C}_6\text{H}_5\text{CH}_3)[\text{Al}(\text{OR}^{\text{F}})_4]$ .

| Compound                                   | $\text{Cs}(\text{C}_6\text{H}_5\text{CH}_3)[\text{Al}(\text{OR}^{\text{F}})_4]$ |
|--------------------------------------------|---------------------------------------------------------------------------------|
| $K_{\alpha}$                               | 1.54184 (Cu)                                                                    |
| Temperature (K)                            | 100                                                                             |
| Space group                                | $P2_1/n$                                                                        |
| Z                                          | 24                                                                              |
| $a$ (Å)                                    | 21.7362(2)                                                                      |
| $b$ (Å)                                    | 31.2247(2)                                                                      |
| $c$ (Å)                                    | 33.0960(3)                                                                      |
| $\alpha$ (°)                               | 90                                                                              |
| $\beta$ (°)                                | 107.8910(10)                                                                    |
| $\gamma$ (°)                               | 90                                                                              |
| $V$ (Å <sup>3</sup> )                      | 21376.2(3)                                                                      |
| $\rho_{\text{calc}}$ (g cm <sup>-3</sup> ) | 2.219                                                                           |
| $\mu_{\text{exp}}$ (mm <sup>-1</sup> )     | 10.490                                                                          |
| $\vartheta_{\text{max}}$ (°)               | 76.378                                                                          |
| $R_1$                                      | 5.62%                                                                           |
| $wR_2$                                     | 14.67%                                                                          |
| Goof                                       | 1.040                                                                           |
| Crystal size (mm×mm×mm)                    | 0.18×0.28×0.78                                                                  |
| Crystal colour                             | colorless                                                                       |
| CCDC No.                                   | 1960207                                                                         |

## 5. DFT calculations details and results

All calculations were performed with the use of Orca <sup>S18</sup> (v. 4.0.1.2) using B3LYP <sup>S19</sup> functional with def2-TZVP <sup>S20</sup> (with ECP and Cs <sup>S21</sup>) and D3BJ dispersion correction. <sup>S22</sup> or RIJCOSX <sup>S23</sup> approximation was used to increase the speed of calculations (with auxiliary basis set by Weigend <sup>S24</sup>). Thermal contributions to *ab initio* reaction energies were calculated with inclusion of zero point energy, thermal contributions to the enthalpy/entropy. Graphical presentation of the calculated structures and molecular orbitals has been performed with Avogadro <sup>S25</sup> or Vesta. <sup>S13</sup>

### 5.1. Coordinates of optimized structures

#### Cs<sup>+</sup>-(C<sub>6</sub>H<sub>5</sub>CH<sub>3</sub>) B3LYP/def2-TZVP/D3BJ

|    |                   |                   |                   |
|----|-------------------|-------------------|-------------------|
| C  | -1.55298854709061 | 1.61409179842090  | -0.04665566911667 |
| C  | -0.20608824339348 | 1.99356428661840  | -0.07745359924700 |
| C  | 0.81100572665118  | 1.04266244038421  | -0.03557681375910 |
| C  | 0.50028052650990  | -0.31405854515234 | 0.03019160427540  |
| C  | -0.83573401035016 | -0.70813585173784 | 0.05143341755952  |
| C  | -1.84887069630477 | 0.24739458578233  | 0.00926648900364  |
| C  | -2.64714597310179 | 2.64568497121835  | -0.01375451571669 |
| H  | 0.04866579178759  | 3.04671636139091  | -0.10226829850079 |
| H  | -1.09016765041315 | -1.75796012191355 | 0.12686102378385  |
| H  | -2.88405014378278 | -0.07044744682498 | 0.05219688214897  |
| H  | 1.84537301814381  | 1.36299570339722  | -0.02784861330991 |
| H  | 1.28895384866559  | -1.05252651891820 | 0.09409778057470  |
| H  | -3.57696843451420 | 2.26222997042325  | -0.43467990409583 |
| H  | -2.36601345249387 | 3.55094939473346  | -0.55307169253033 |
| H  | -2.85751343122056 | 2.93925334442210  | 1.01795680008316  |
| Cs | -0.50082832909268 | 0.47935562775577  | -3.29031489115291 |

#### C<sub>6</sub>H<sub>5</sub>CH<sub>3</sub> B3LYP/def2-TZVP/D3BJ

|   |                   |                   |                   |
|---|-------------------|-------------------|-------------------|
| C | -1.56473879485697 | 1.60774051209632  | -0.00000060859449 |
| C | -0.22104914807202 | 1.98848970594859  | -0.00000013724249 |
| C | 0.79134895610879  | 1.03881432155158  | -0.00000041596318 |
| C | 0.47872739722706  | -0.31696655760333 | 0.00000005844254  |
| C | -0.85301333439763 | -0.70996555053212 | 0.00000004087133  |
| C | -1.86344060025997 | 0.24631764384811  | -0.00000009618781 |
| C | -2.65422905045620 | 2.64634761350377  | 0.00000006854494  |
| H | 0.03266457309567  | 3.04260278663147  | -0.00000031120099 |
| H | -1.10868714874082 | -1.76223479471793 | -0.00000009025738 |
| H | -2.90020905433412 | -0.06948144684968 | -0.00000026859002 |
| H | 1.82661358237225  | 1.35648194574242  | -0.00000020332523 |
| H | 1.26728025610395  | -1.05850675097700 | 0.00000109099985  |
| H | -3.64184563261802 | 2.18480277117256  | -0.00000001390742 |
| H | -2.58495116310355 | 3.29131440698536  | -0.87942732209739 |
| H | -2.58495083806842 | 3.29131339319989  | 0.87942820850772  |

#### NH<sub>4</sub><sup>+</sup> B3LYP/def2-TZVP/D3BJ

|   |                   |                   |                   |
|---|-------------------|-------------------|-------------------|
| N | -0.23246307446417 | 0.29429869463271  | -0.01004821075834 |
| H | 0.79068791738210  | 0.35145441389858  | 0.01998959538056  |
| H | -0.60507467633292 | 1.10204210931161  | -0.51978309021493 |
| H | -0.60240885798735 | 0.29248188771124  | 0.94594013442097  |
| H | -0.51296130859766 | -0.56897710555414 | -0.48666842882826 |

### N<sub>2</sub>H<sub>7</sub><sup>+</sup> B3LYP/def2-TZVP/D3BJ

|   |                   |                   |                   |
|---|-------------------|-------------------|-------------------|
| H | 0.80705538373505  | 0.43776681029806  | -0.02046926157133 |
| H | -0.79392503946007 | 1.05049396841255  | -0.52565093785329 |
| H | -0.68823392063696 | 0.30869378474451  | 0.95003006130973  |
| H | -0.59608200858890 | -0.58974604736335 | -0.43640375314408 |
| N | 2.32231603527584  | 0.62285109196387  | -0.03738003095423 |
| H | 2.59901548585837  | 1.56193481690543  | 0.24202493396214  |
| H | 2.79613877813952  | -0.02034697843149 | 0.59368535997936  |
| H | 2.71711341699923  | 0.46629399078629  | -0.96269284400600 |

### HCl B3LYP/def2-TZVP/D3BJ

|    |                   |                  |                  |
|----|-------------------|------------------|------------------|
| Cl | 1.24106490345696  | 0.00000000000000 | 0.00000000000000 |
| H  | -0.04106490345696 | 0.00000000000000 | 0.00000000000000 |

### NH<sub>4</sub>Cl B3LYP/def2-TZVP/D3BJ

|    |                   |                   |                   |
|----|-------------------|-------------------|-------------------|
| N  | -0.16900093693308 | 0.05368279604144  | 0.11435838027586  |
| H  | 0.75504079510498  | -0.32742093760746 | 0.28592581935059  |
| H  | -0.04950577236071 | 1.69801426839939  | -0.50004793241511 |
| H  | -0.68273031212324 | 0.04167455378346  | 0.98848725242791  |
| H  | -0.64533956069071 | -0.55576592205614 | -0.54143649794028 |
| Cl | 0.05187578700275  | 2.95522524143931  | -0.95010702169896 |

## Supplementary references

- <sup>51</sup> I. Krossing, A. Reisinger, *Coord. Chem. Rev.*, **2006**, *250*, 2721–2744.
- <sup>52</sup> M. G. Freire, L. Gomes, L. M. N. B. F. Santos, I. M. Marrucho, J. A. P. Coutinho, *J. Phys. Chem. B* **2006**, *110*, 22923–22929.
- <sup>53</sup> I. K. I. Raabe, A. Reisinger, in *Experiments in Green and Sustainable Chemistry (Eds. H. W. Roesky, D. K. Kennepohl)*, Wiley-VCH, Weinheim, 2009, pp. 131–144.
- <sup>54</sup> J. A. Dilts, E. C. Ashby, *Inorg. Chem.* **1972**, *11*, 1230–1236.
- <sup>55</sup> T. Jaroń, P. A. Orłowski, W. Wegner, K. J. Fijałkowski, P. J. Leszczyński and W. Grochala, *Angew. Chem. Int. Ed.*, **2015**, *54*, 1236–1239.
- <sup>56</sup> P. J. Malinowski, D. Himmel and I. Krossing, *Angew. Chemie Int. Ed.*, **2016**, *55*, 9259–9261.
- <sup>57</sup> T. A. Engesser, C. Friedmann, A. Martens, D. Kratzert, P. J. Malinowski, I. Krossing, *Chem. Eur. J.* **2016**, *22*, 15085–15094.
- <sup>58</sup> A. Martens, P. Weis, M. C. Krummer, M. Kreuzer, A. Meierhöfer, S. C. Meier, J. Bohnenberger, H. Scherer, I. Riddlestone, I. Krossing, *Chem. Sci.* **2018**, *9*, 7058–7068.
- <sup>59</sup> Agilent (2014). *CrysAlis PRO*. Agilent Technologies Ltd, Yarnton, Oxfordshire, England.
- <sup>60</sup> G. M. Sheldrick, *Acta Cryst.* **2015**, *A71*, 3–8.
- <sup>61</sup> C. B. Hübschle, G. M. Sheldrick, B. Dittrich, *J. Appl. Crystallogr.* **2011**, *44*, 1281–1284.
- <sup>62</sup> D. Kratzert, J. J. Holstein, I. Krossing, *J. Appl. Crystallogr.* **2015**, *48*, 933–938.
- <sup>63</sup> K. Momma, F. Izumi, *J. Appl. Crystallogr.* **2011**, *44*, 1272–1276.
- <sup>64</sup> I. Krossing, H. Brands, R. Feuerhake, S. Koenig, *J. Fluorine Chem.* **2001**, *112*, 83–90.
- <sup>65</sup> I. Raabe, K. Wagner, K. Guttsche, M. Wang, M. Grätzel, G. Santiso-Quiñones, I. Krossing, *Chem. Eur. J.* **2009**, *15*, 1966–1976.
- <sup>66</sup> C. R. Martinez and B. L. Iverson, *Chem. Sci.*, **2012**, *3*, 2191.
- <sup>67</sup> H. D. B. Jenkins, H. K. Roobottom, J. Passmore and L. Glasser, *Inorg. Chem.*, **1999**, *38*, 3609–3620.
- <sup>68</sup> F. Neese, *WIREs Comput. Mol. Sci.* **2018**, e1327.
- <sup>69</sup> a) A. D. Becke, *J. Chem. Phys.* **1993**, *98*, 5648–5652; b) C. Lee, W. Yang, R. G. Parr, *Phys. Rev. B* **1988**, *37*, 785–789; c) P. J. Stephens, F. J. Devlin, C. F. Chabalowski, M. J. Frisch, *J. Phys. Chem.* **1994**, *98*, 11623–11627.
- <sup>70</sup> a) F. Weigend, M. Häser, H. Patzelt, R. Ahlrichs, *Chem. Phys. Lett.* **1998**, *294*, 143–152; b) F. Weigend, R. Ahlrichs, *Phys. Chem. Chem. Phys.* **2005**, *7*, 3297–3305.

---

<sup>S21</sup> T. Leininger, A. Nicklass, W. Kuechle, H. Stoll, M. Dolg, A. Bergner, *Chem. Phys. Lett.* **1996**, 255, 274–280.

<sup>S22</sup> S. Grimme, S. Ehrlich, L. Goerigk, *J. Comput. Chem.* **2011**, 32, 1456-1465.

<sup>S23</sup> F. Neese, F. Wennmohs, A. Hansen, U. Becker, *Chem. Phys.* **2009**, 356, 98–109.

<sup>S24</sup> F. Weigend, *Phys. Chem. Chem. Phys.* **2006**, 8, 1057–1065.

<sup>S25</sup> a) Avogadro: an open-source molecular builder and visualization tool. Version 1.1.1. <http://avogadro.cc/> ;

b) M. D. Hanwell; D. E. Curtis, D. C. Lonie, T. Vandermeersch, E. Zurek, G. E. Hutchison, *J. Cheminform.* **2012**, 4:17.
